# Supplementary material for: Development of an 18F-labeled azobenzothiazole tracer for α-synuclein aggregates in the brain
Source: Royal Society of Chemistry journal article supplement (doi:10.1039/d4ob00492b), 2024-01-01
Supplement: d4ob00492b1.pdf [file d4ob00492b1.pdf]

*Electronic Supplementary Information for*

**Development of  $^{18}\text{F}$ -Labeled Azobenzothiazole Tracer for  $\alpha$ -Synuclein Aggregates in the  
Brain**

Jiajun Wu<sup>a</sup>, Meiting Mao,<sup>a</sup> Jie Yang,<sup>a</sup> Kexin Li,<sup>a</sup> Pengxin Deng,<sup>a</sup> Jing Zhong,<sup>a</sup> Xiaoi Wu,<sup>b,\*</sup>  
and Yan Cheng<sup>a,\*</sup>

<sup>a</sup>Key Laboratory of Drug-Targeting and Drug Delivery System of the Education Ministry and Sichuan Province, Sichuan Engineering Laboratory for Plant-Sourced Drug and Sichuan Research Center for Drug Precision Industrial Technology, West China School of Pharmacy, Sichuan University, Chengdu, 610041, China

<sup>b</sup>Department of Nuclear Medicine, West China Hospital, Sichuan University, Chengdu, 610041, China

\*To whom correspondence should be addressed: e-mail: [yancheng@scu.edu.cn](mailto:yancheng@scu.edu.cn) for Y. Cheng;  
[xiaoi.wu@scu.edu.cn](mailto:xiaoi.wu@scu.edu.cn) for X. Wu.

## Table of Contents

|                                                                    |     |
|--------------------------------------------------------------------|-----|
| 1. Chemistry .....                                                 | S3  |
| 2. HPLC Purity .....                                               | S17 |
| 3. Optical Measurements .....                                      | S25 |
| 4. Preparation of Protein Aggregates.....                          | S30 |
| 5. Spectral Measurements with Protein Aggregates in Solutions..... | S31 |
| 6. Fluorescence Staining of Brain Sections.....                    | S31 |
| 7. Saturation Binding Assays of NN-F.....                          | S34 |
| 8. Stability Studies.....                                          | S34 |
| References .....                                                   | S35 |

# 1. Chemistry

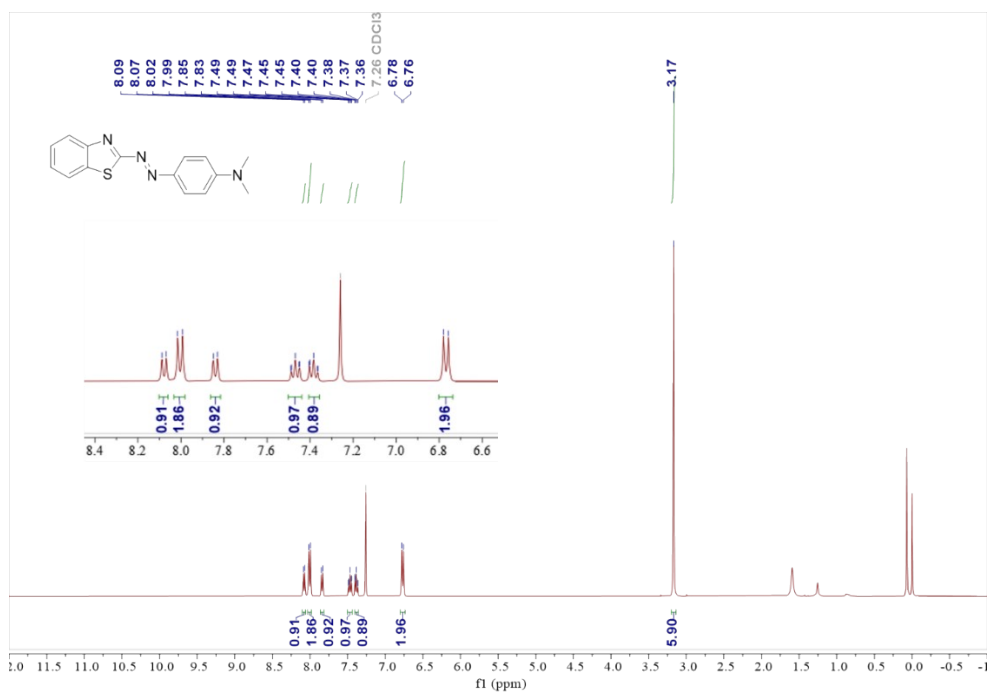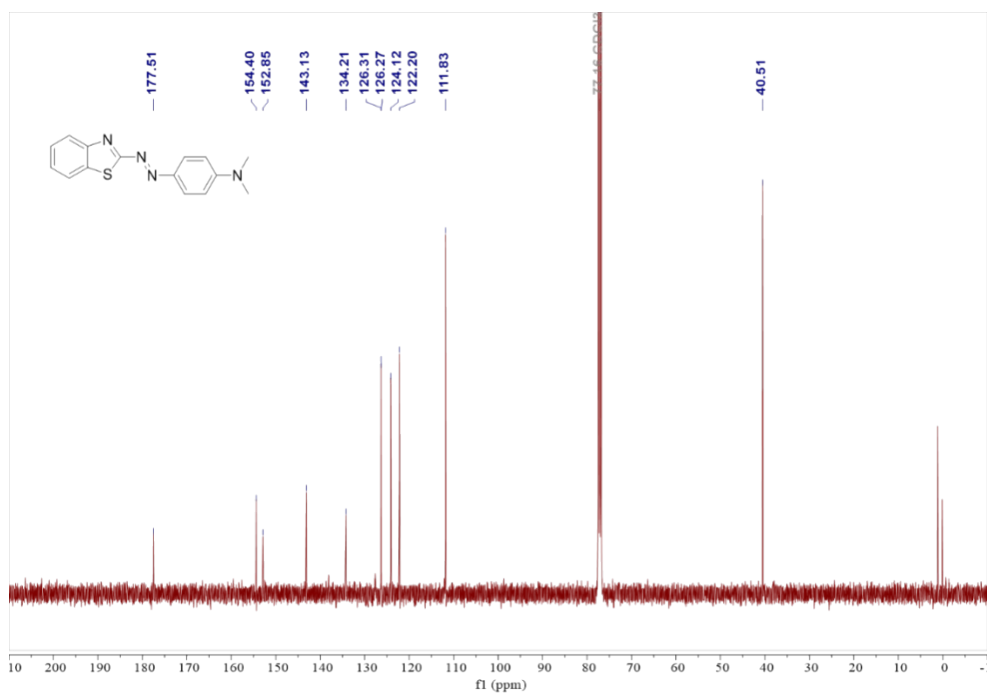

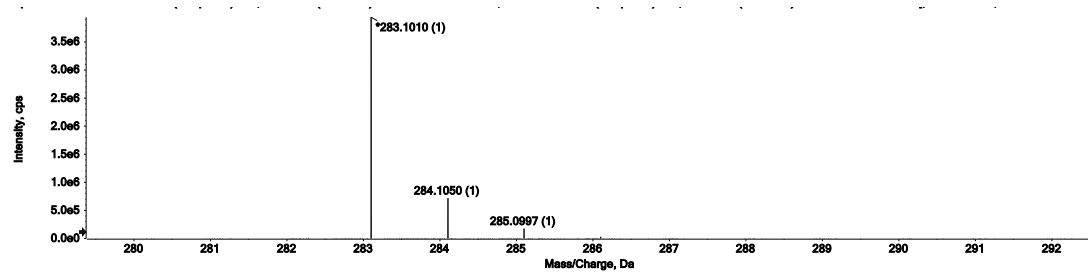

Fig. S1  $^1\text{H}$  NMR,  $^{13}\text{C}$  NMR, and HRMS spectra of NN-Me.

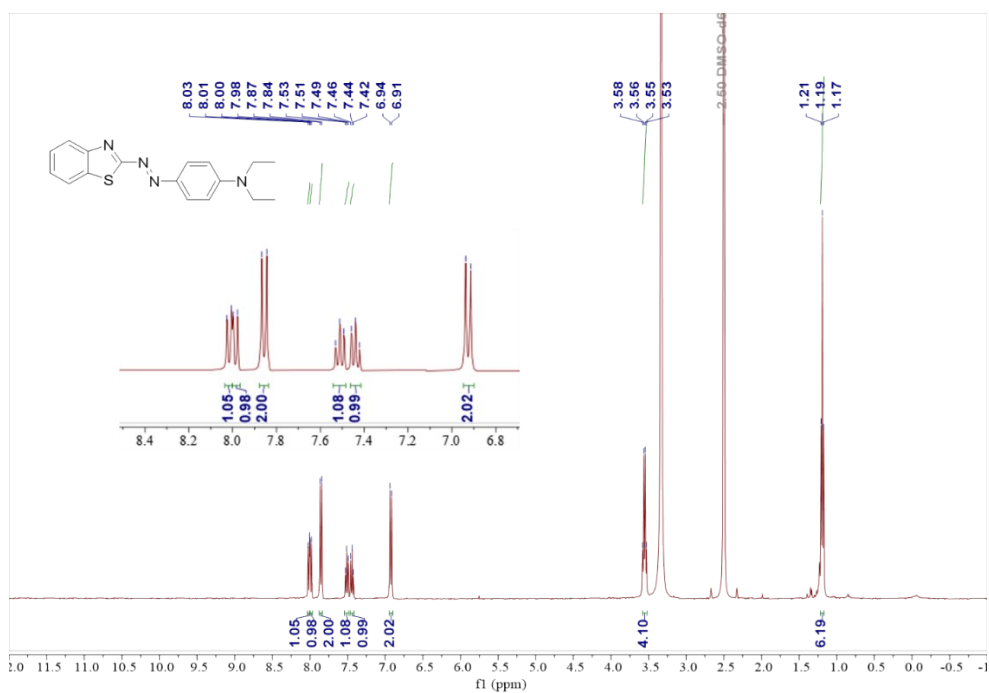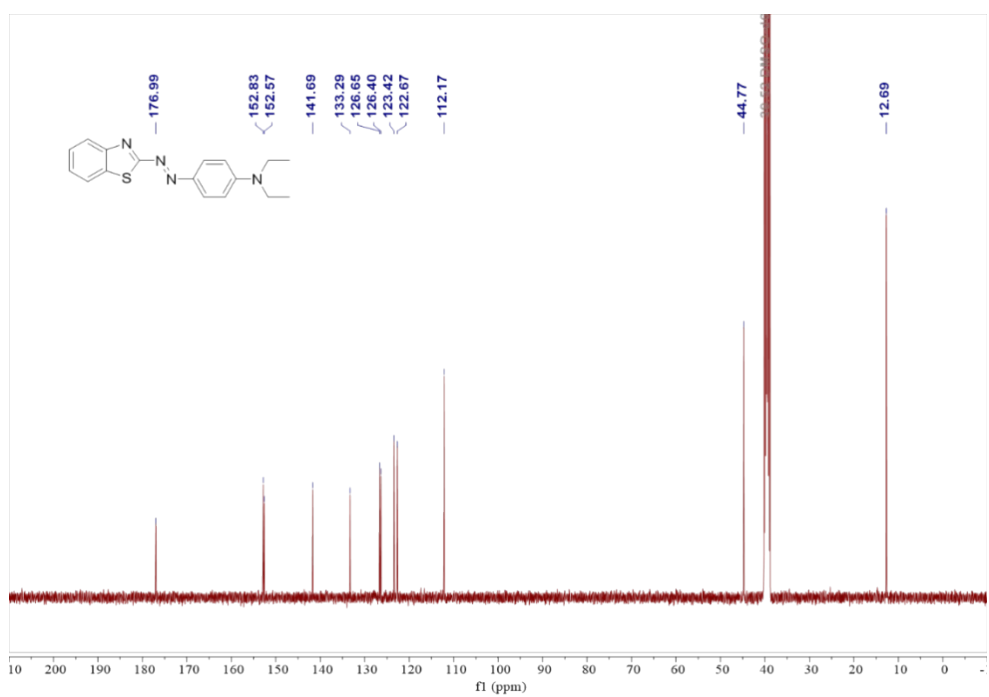

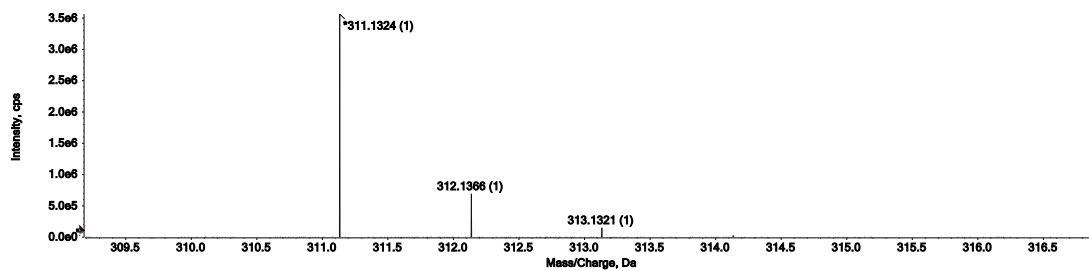

Fig. S2  $^1\text{H}$  NMR,  $^{13}\text{C}$  NMR, and HRMS spectra of NN-Et.

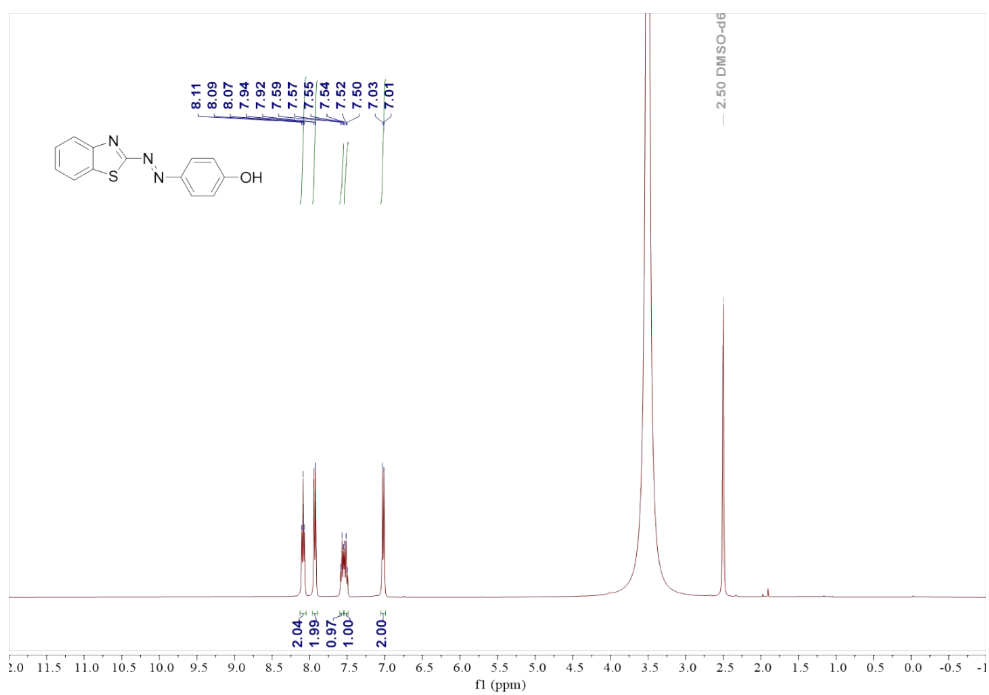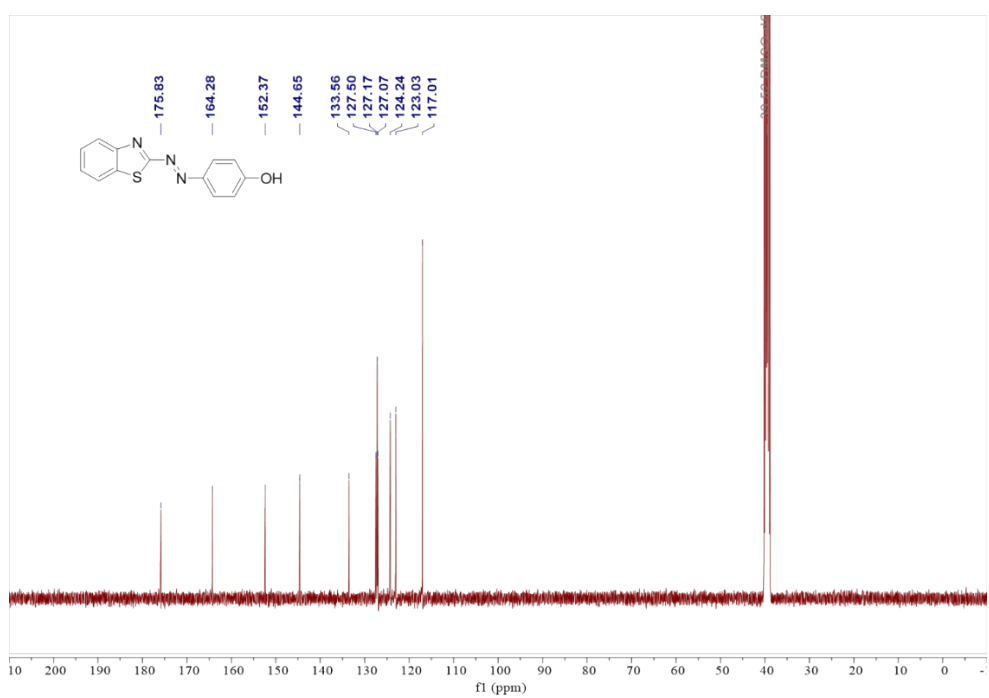

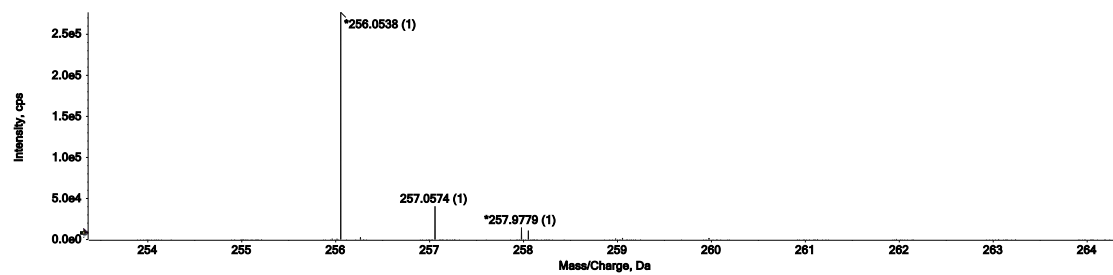

Fig. S3  $^1\text{H}$  NMR,  $^{13}\text{C}$  NMR, and HRMS spectra of NN-OH.

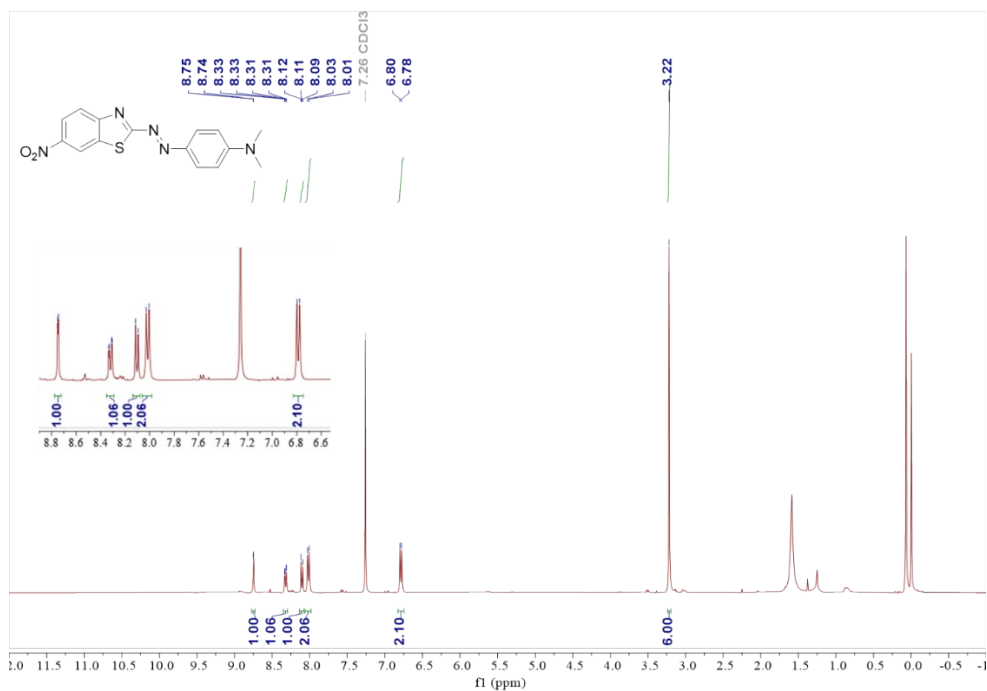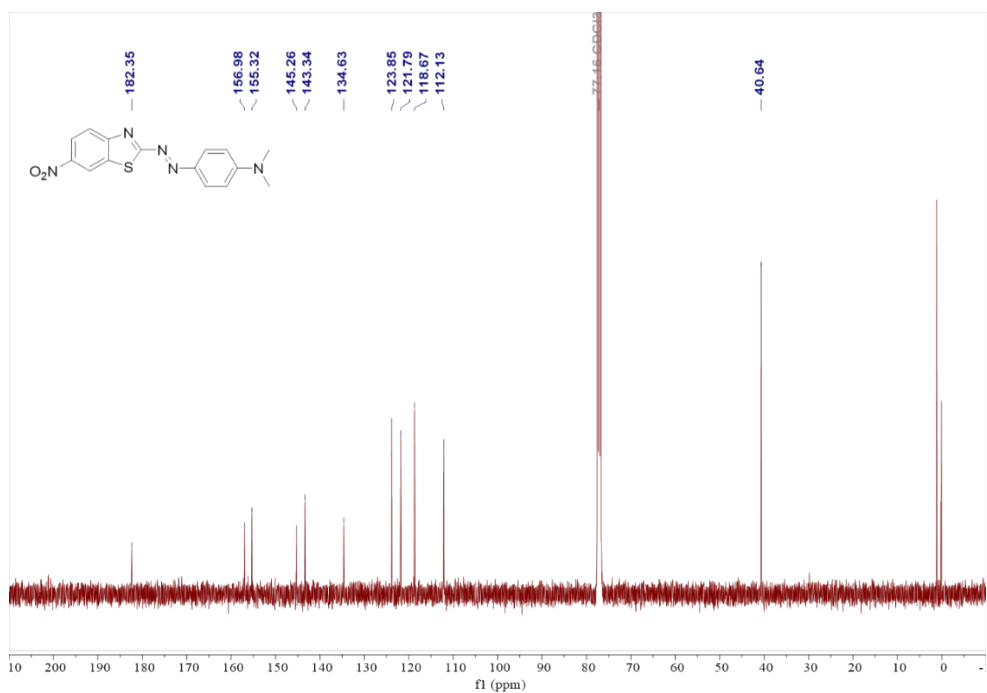

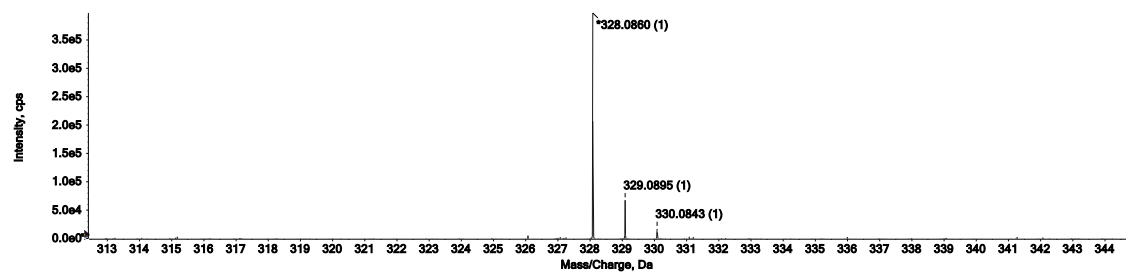

Fig. S4  $^1\text{H}$  NMR,  $^{13}\text{C}$  NMR, and HRMS spectra of NiNN-Me.

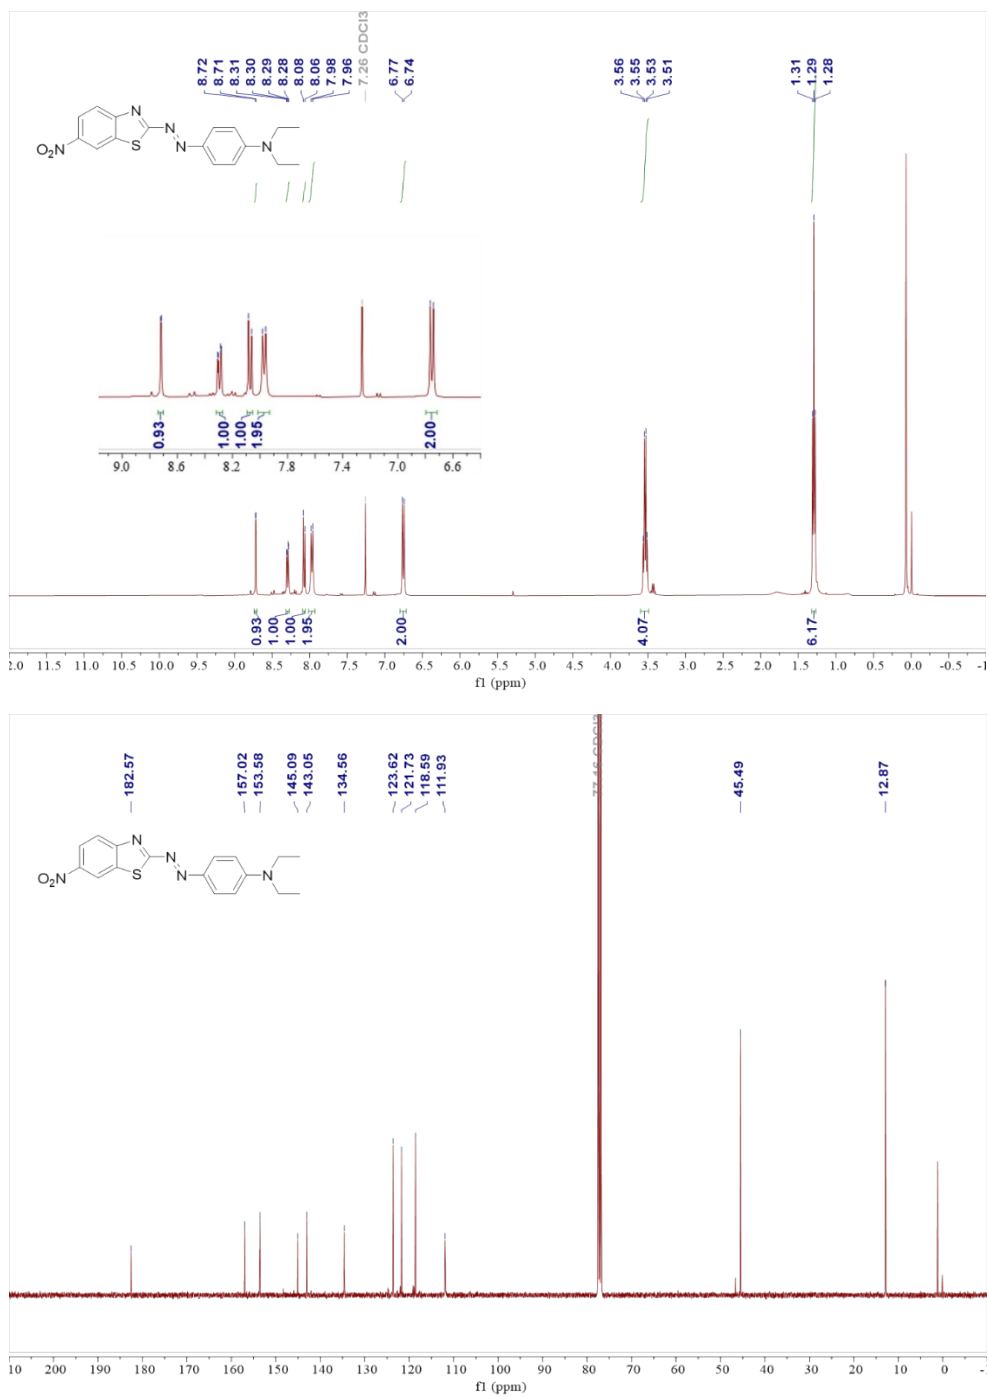

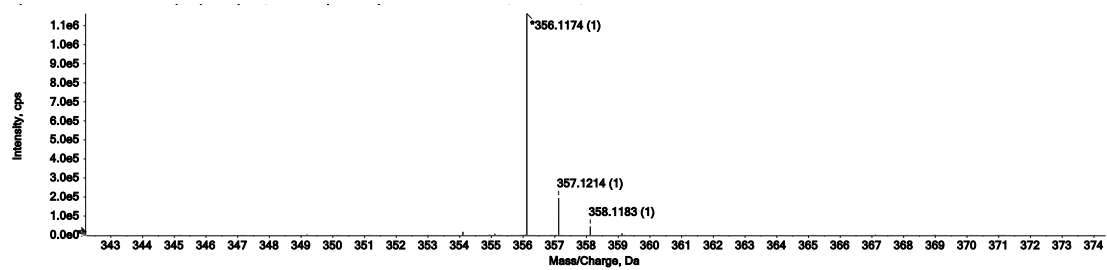

Fig. S5  $^1\text{H}$  NMR,  $^{13}\text{C}$  NMR, and HRMS spectra of NiNN-Et.

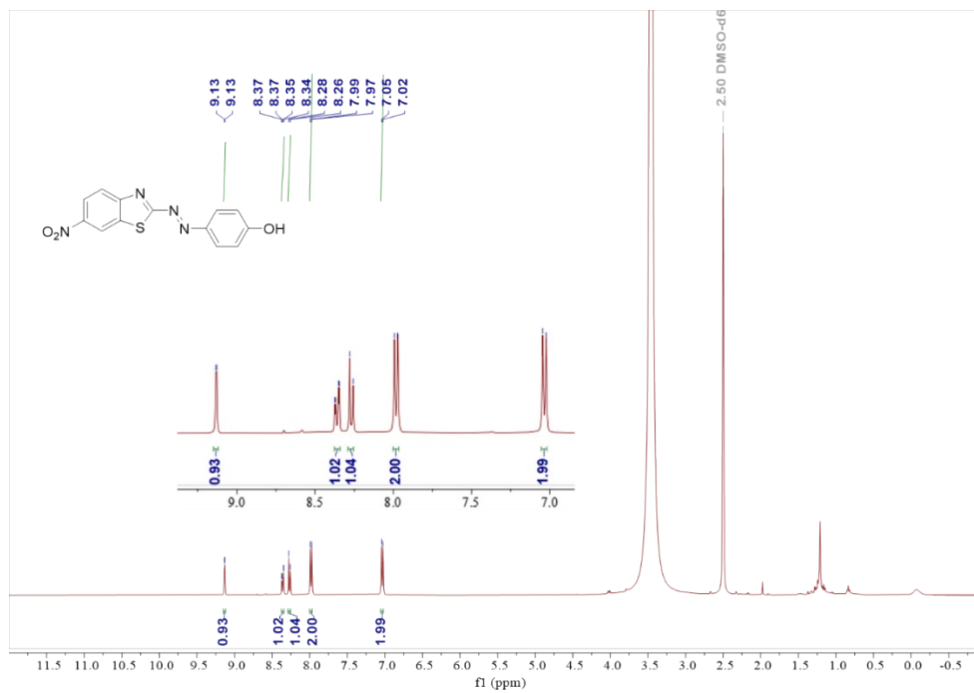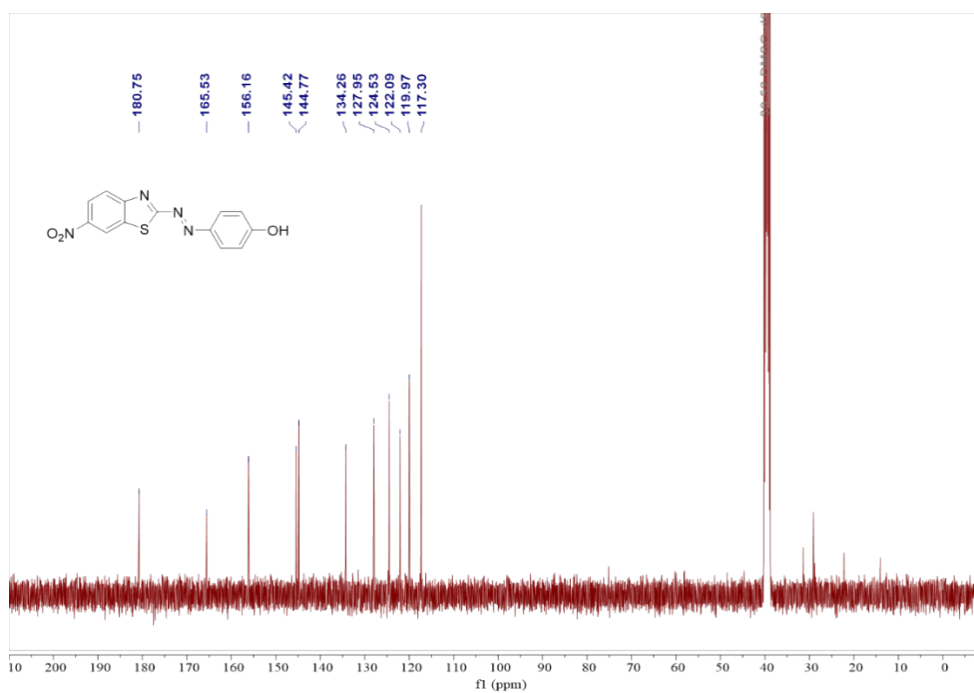



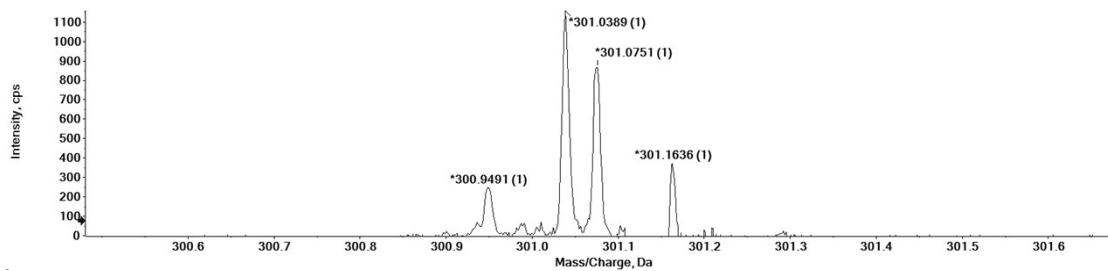

**Fig. S6**  $^1\text{H}$  NMR,  $^{13}\text{C}$  NMR, and HRMS spectra of NiNN-OH.

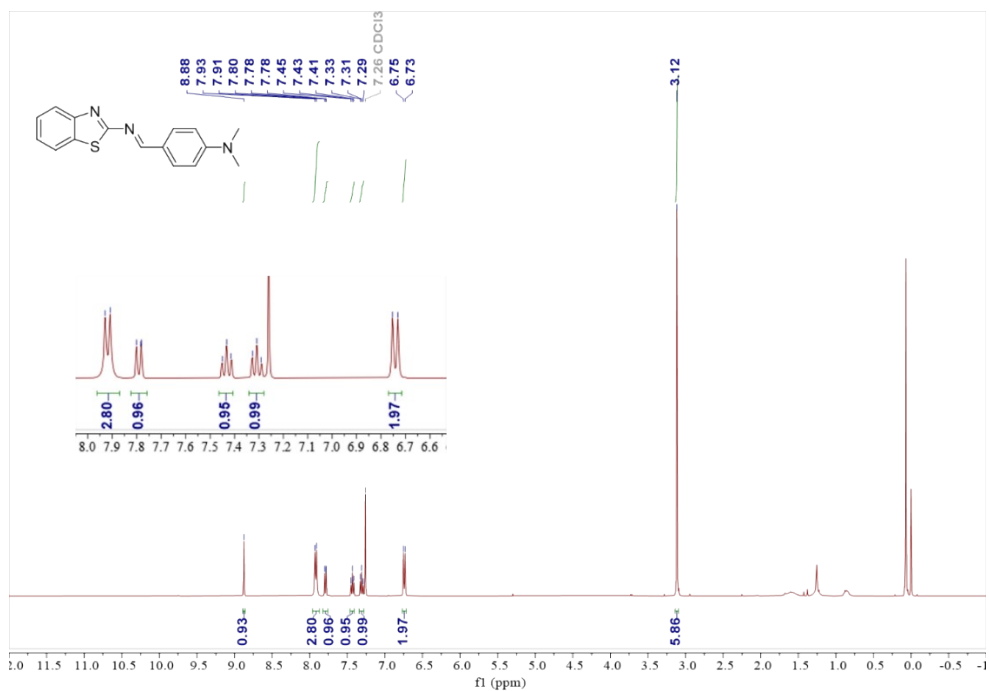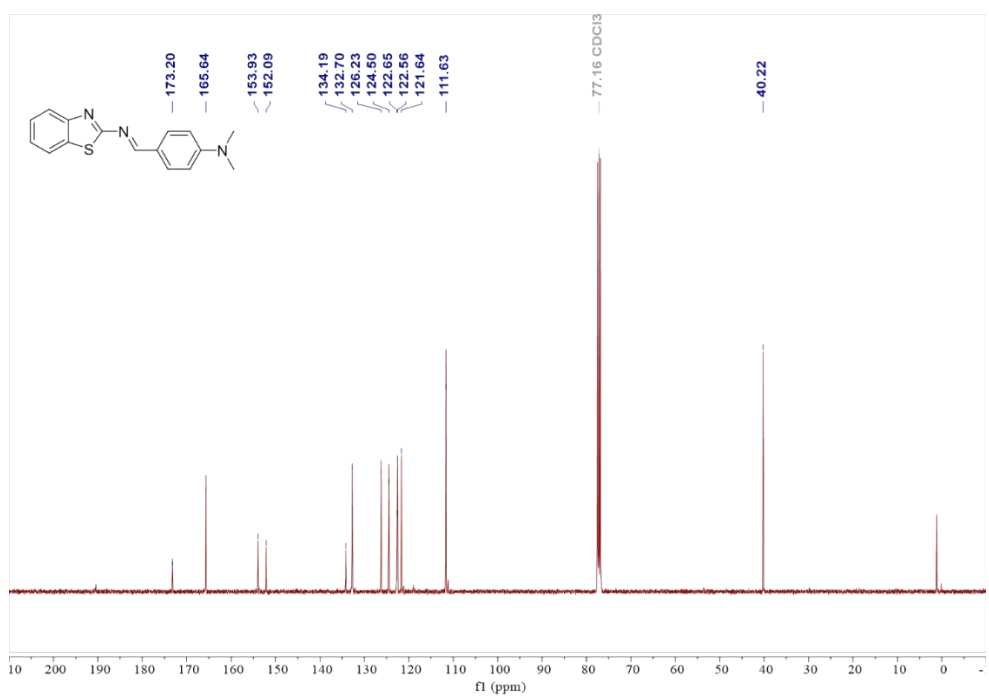

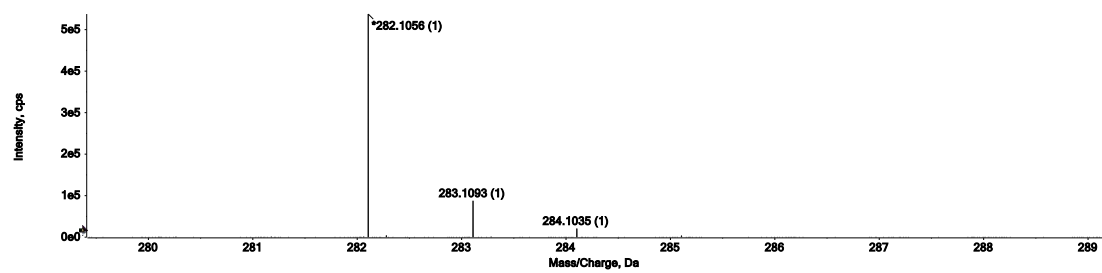

Fig. S7  $^1\text{H}$  NMR,  $^{13}\text{C}$  NMR, and HRMS spectra of NC-Me.

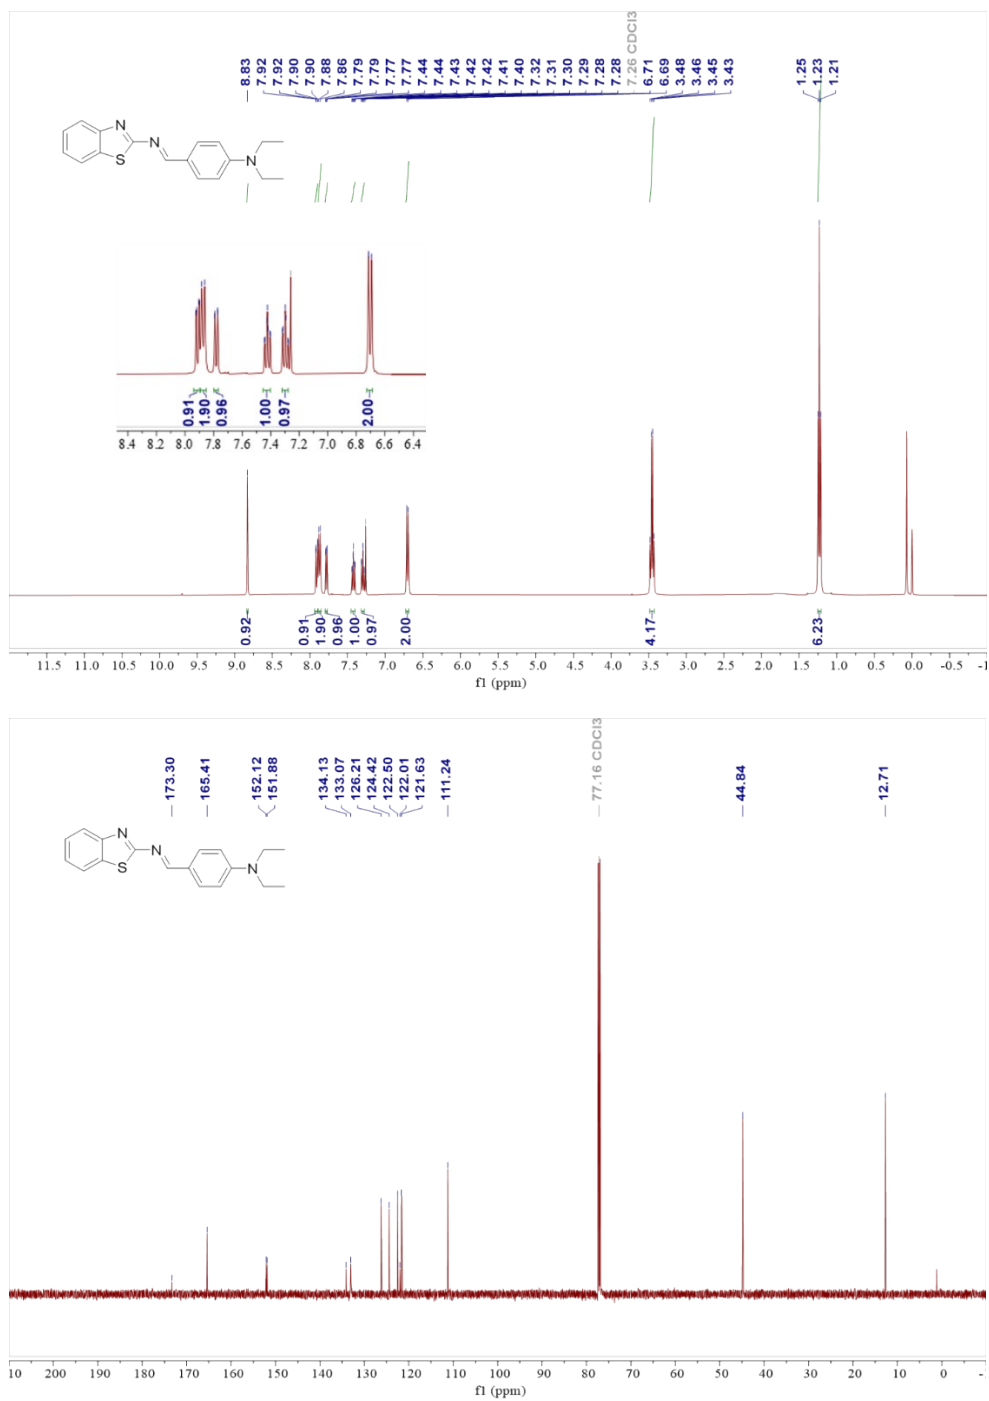

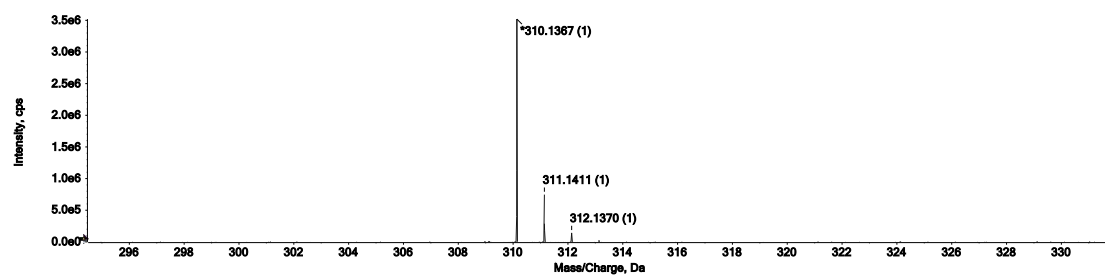

Fig. S8  $^1\text{H}$  NMR,  $^{13}\text{C}$  NMR, and HRMS spectra of NC-Et.

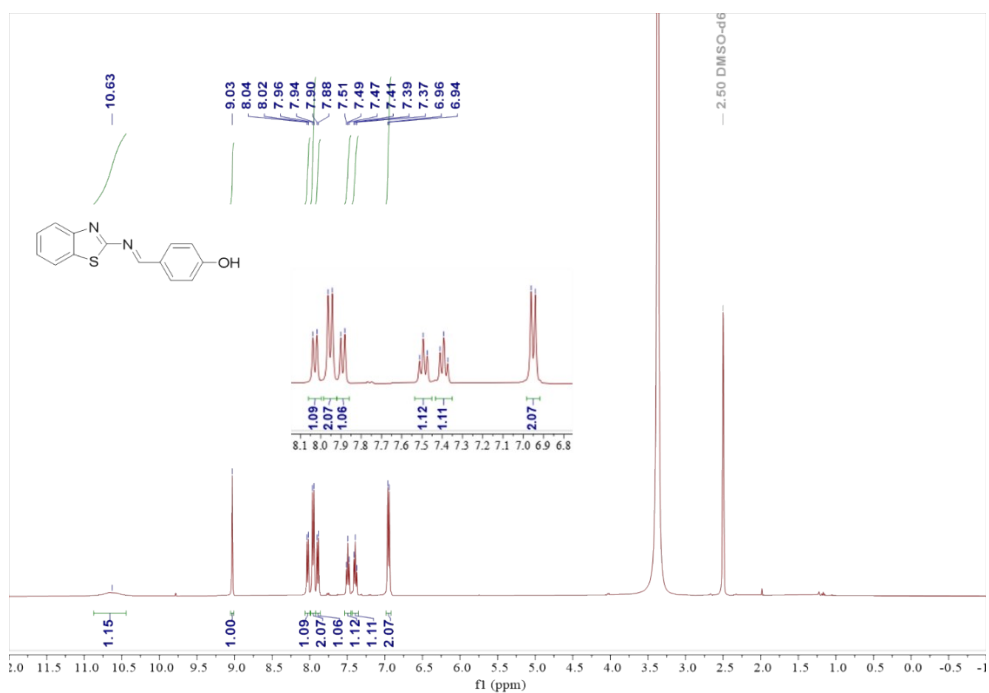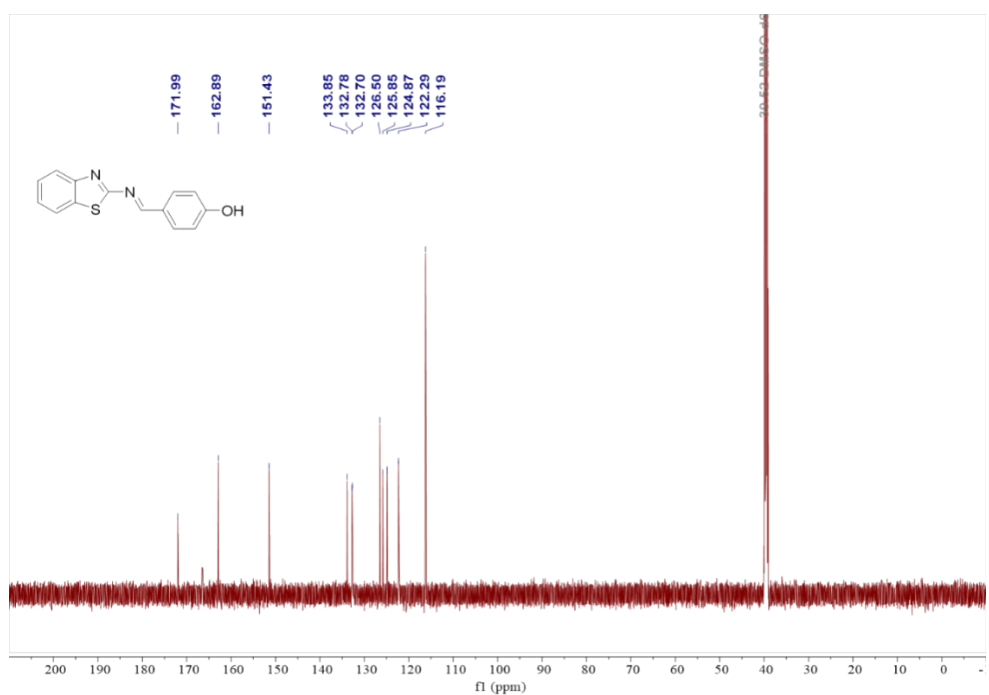

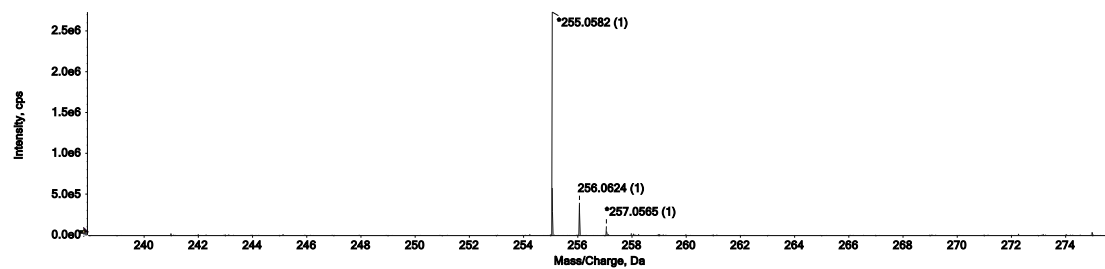

Fig. S9  $^1\text{H}$  NMR,  $^{13}\text{C}$  NMR, and HRMS spectra of NC-OH.

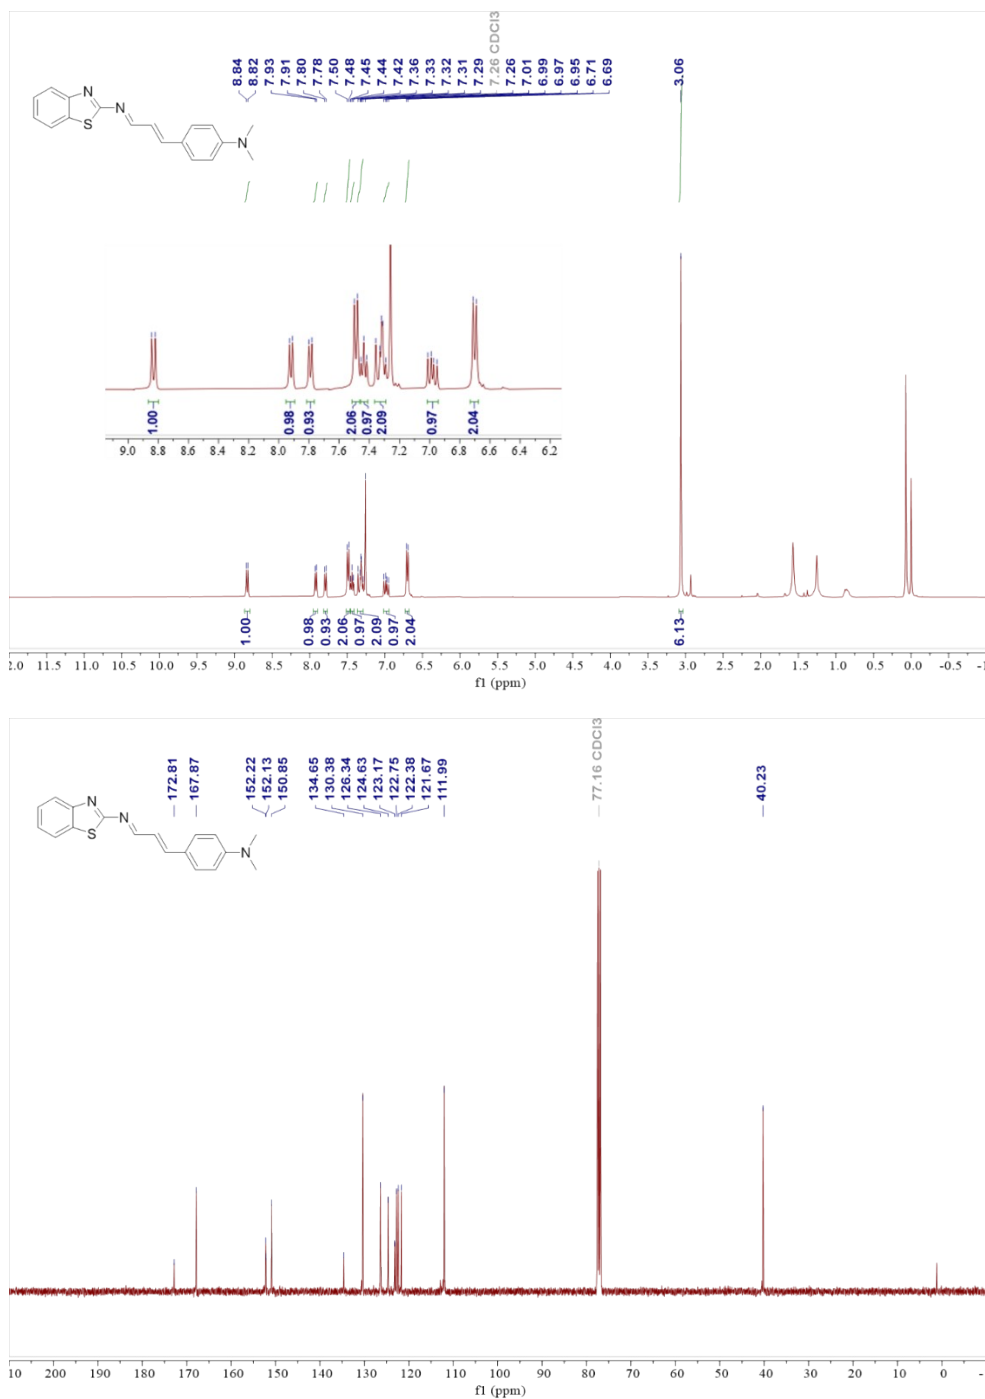

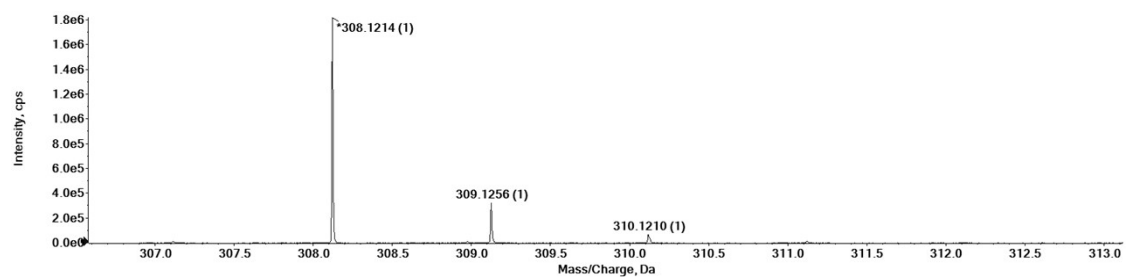

Fig. S10  $^1\text{H}$  NMR,  $^{13}\text{C}$  NMR, and HRMS spectra of NCC-Me.

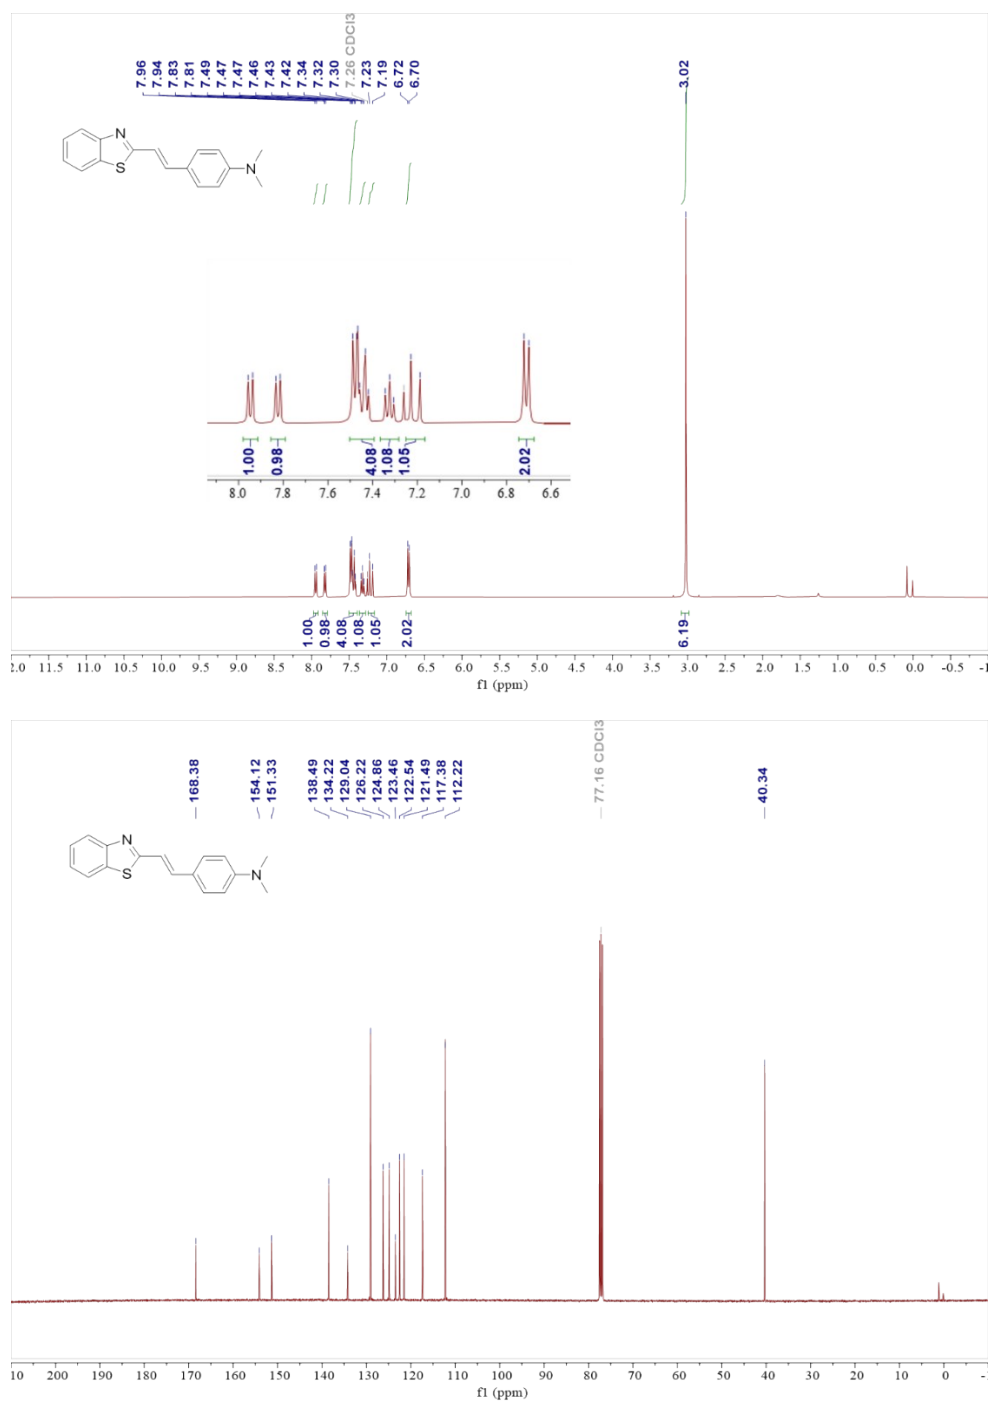

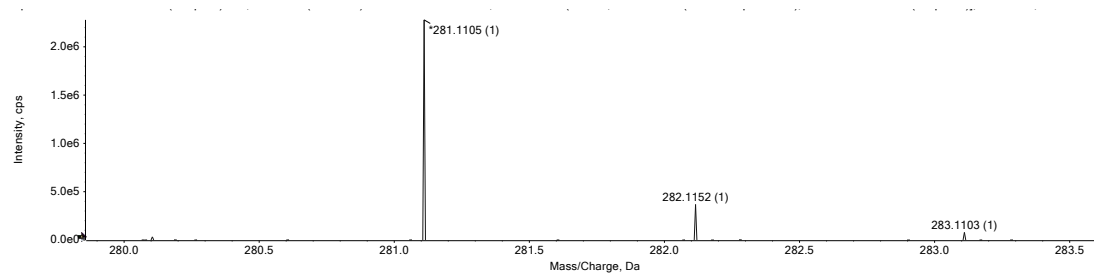

**Fig. S11**  $^1\text{H}$  NMR,  $^{13}\text{C}$  NMR, and HRMS spectra of TZDM-1.

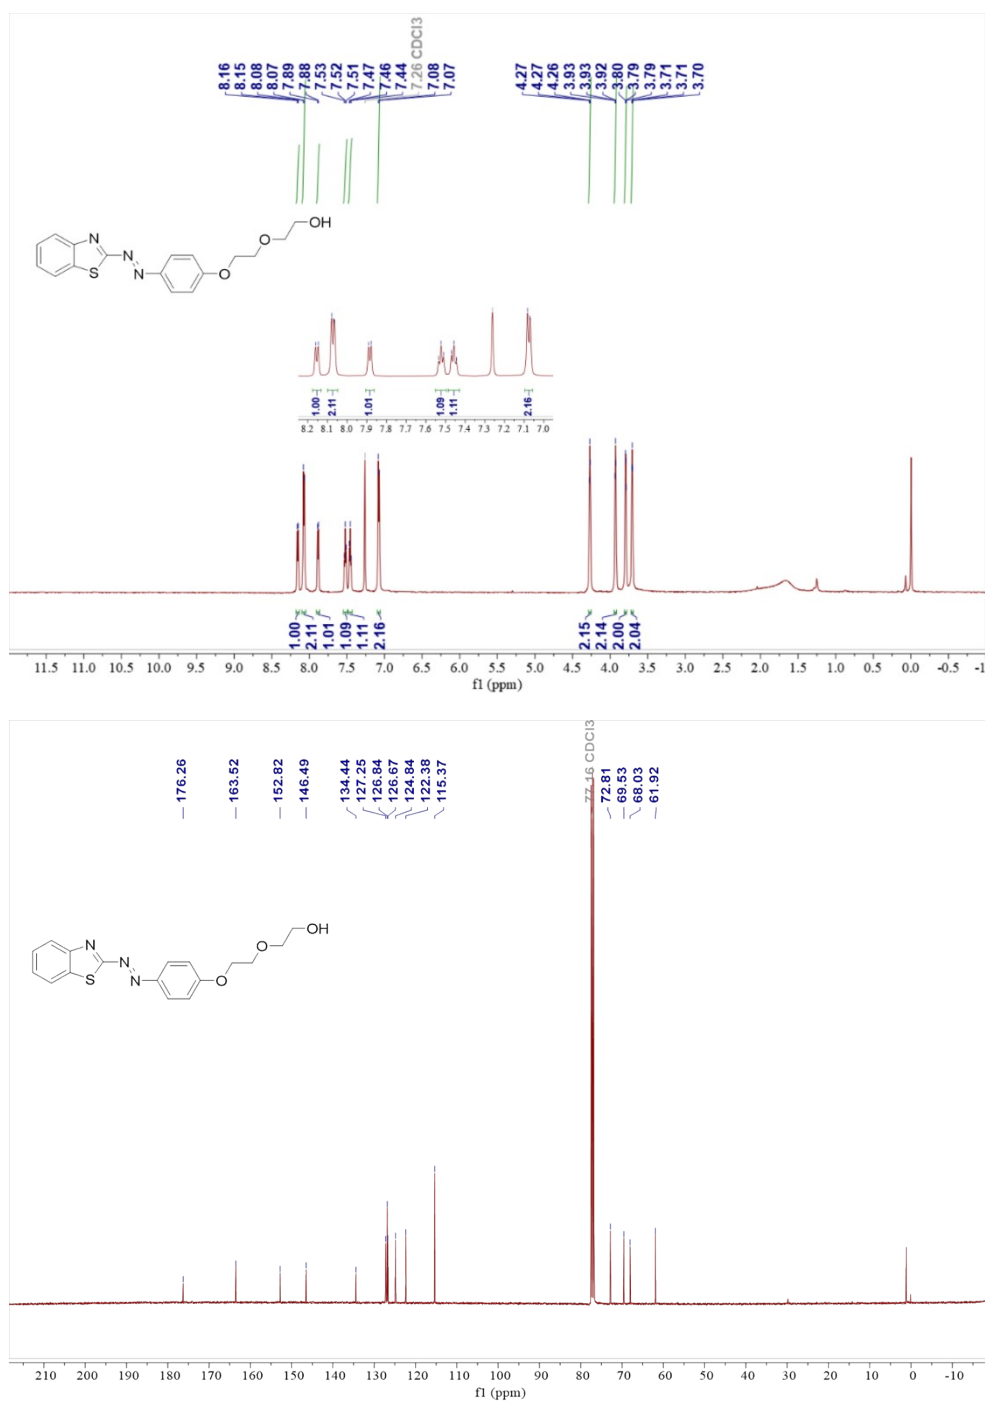

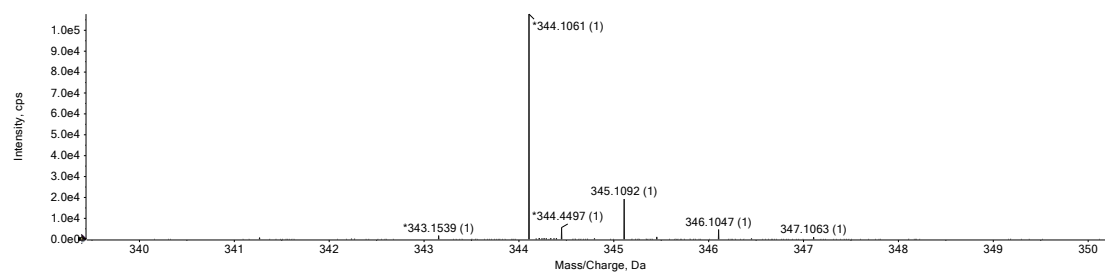

Fig. S12  $^1\text{H}$  NMR,  $^{13}\text{C}$  NMR, and HRMS spectra of NN-peg.

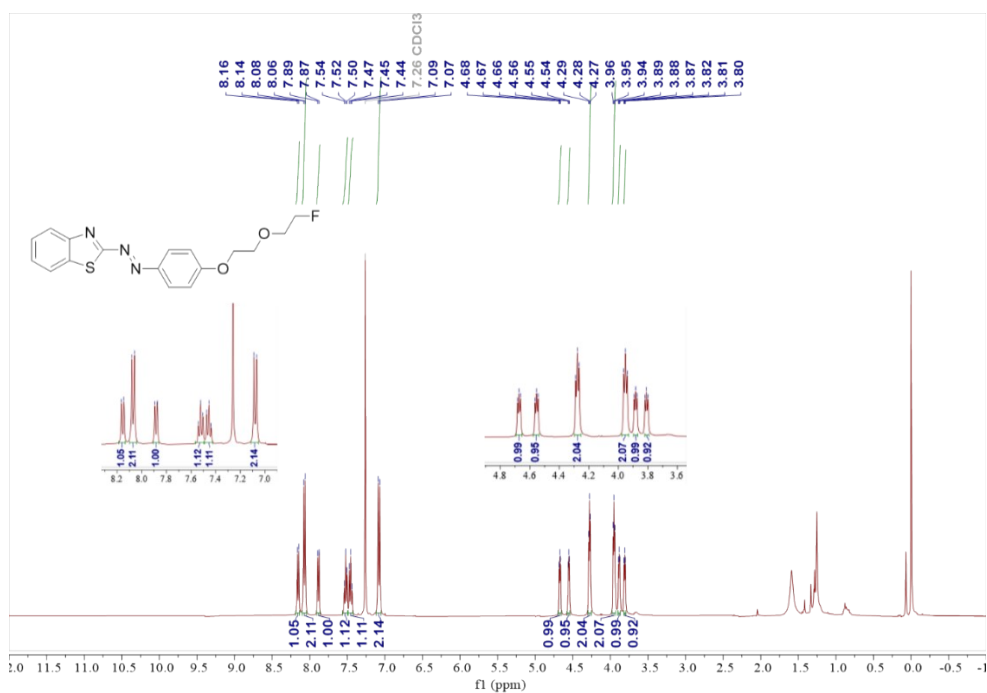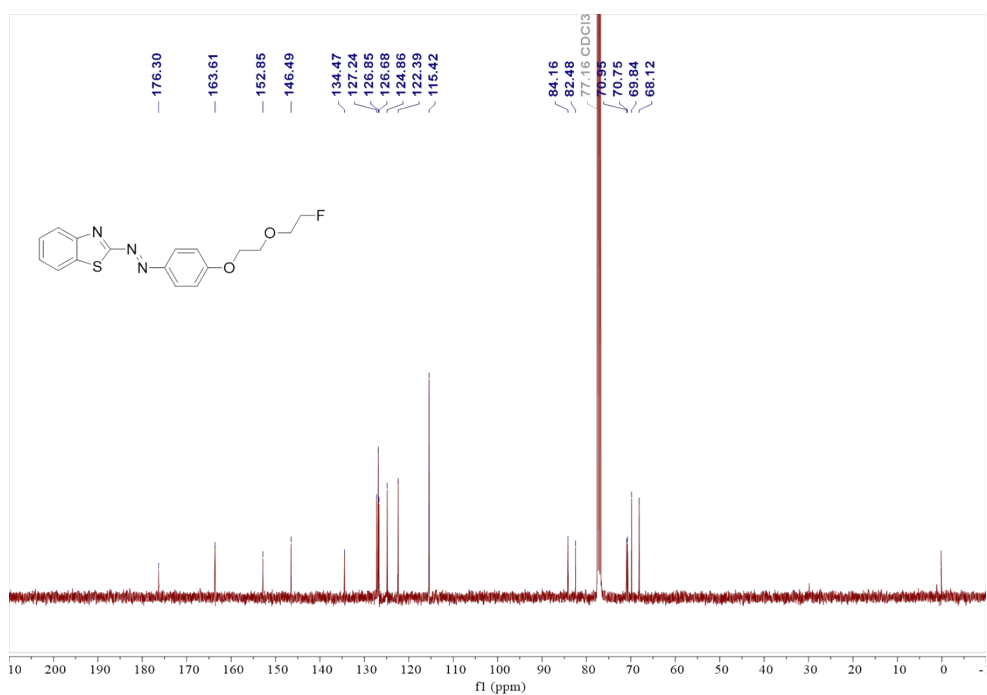

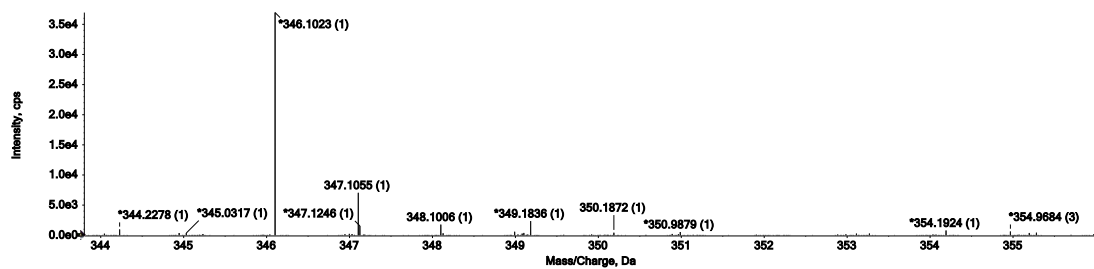

Fig. S13  $^1\text{H}$  NMR,  $^{13}\text{C}$  NMR, and HRMS spectra of NN-F.

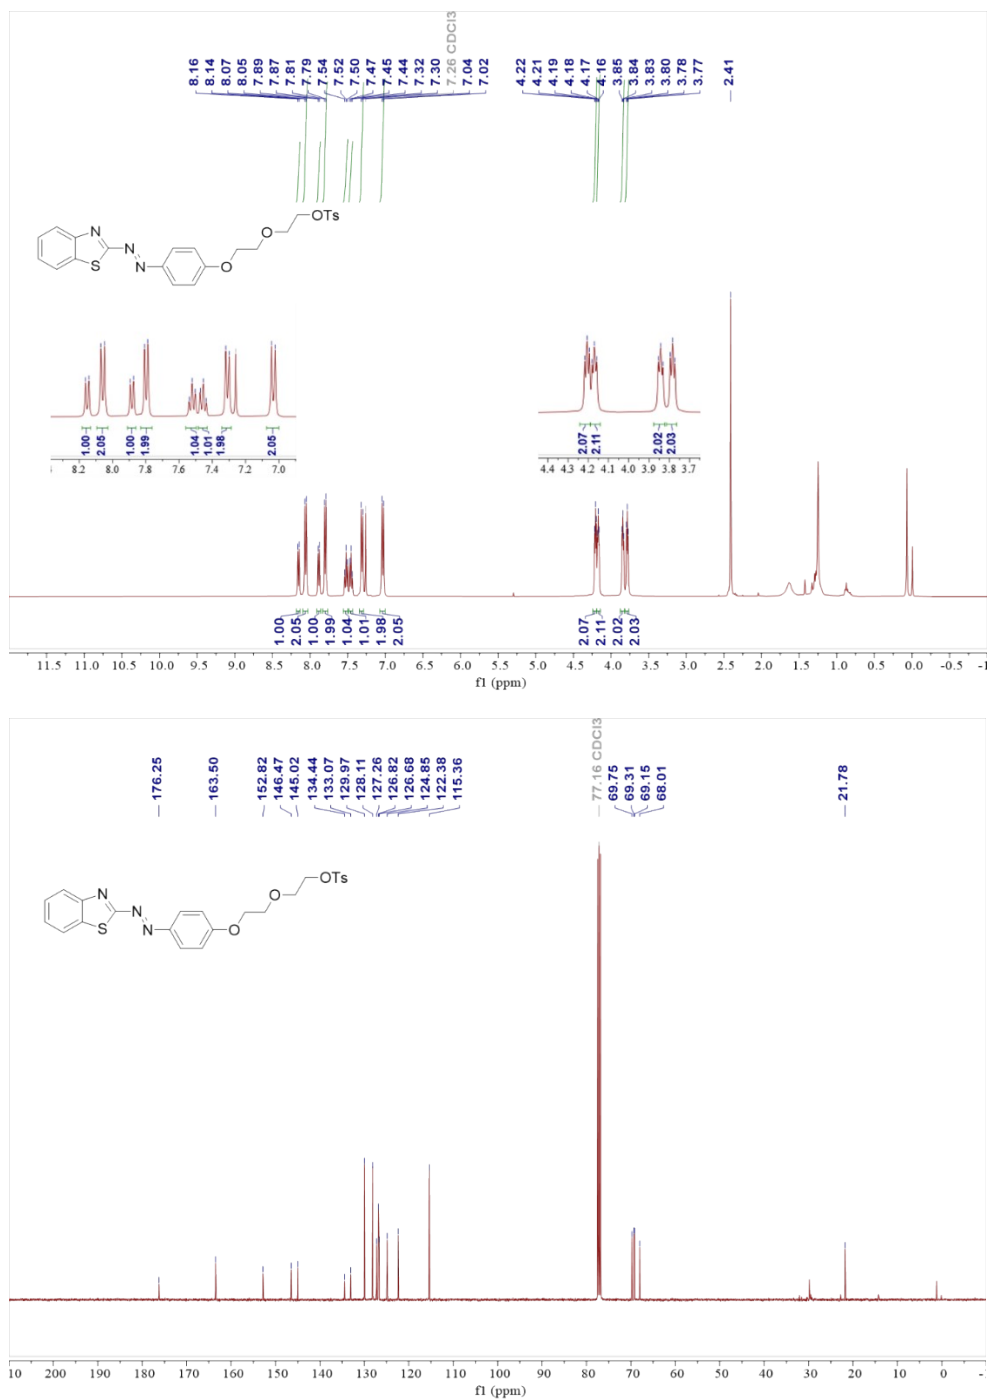



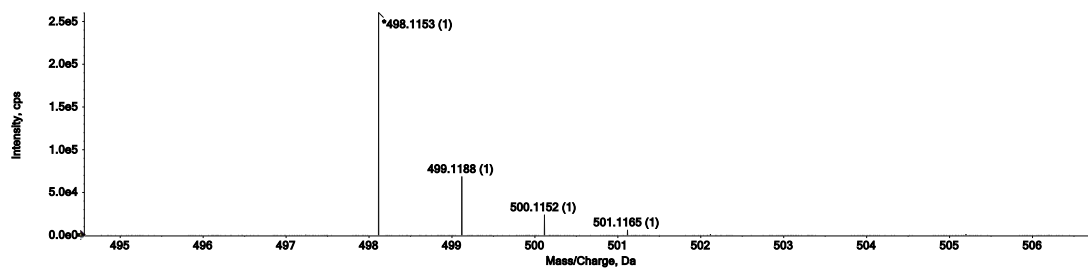

Fig. S14  $^1\text{H}$  NMR,  $^{13}\text{C}$  NMR, and HRMS spectra of NN-OTs.

## 2. HPLC Purity.

Table S1 HPLC purity of the synthesized compounds.

| Mobile phase                                 | Mobile phase ration | Flow rate  | Compound | Purity (%) |
|----------------------------------------------|---------------------|------------|----------|------------|
| acetonitrile: H <sub>2</sub> O               | 60/40               | 1.0 mL/min | NN-Me    | 97.68      |
|                                              |                     |            | NN-OH    | 99.04      |
|                                              |                     |            | NiNN-OH  | 96.56      |
| acetonitrile: H <sub>2</sub> O               | 70/30               | 1.0 mL/min | NN-Et    | 98.99      |
|                                              |                     |            | NiNN-Me  | 95.25      |
|                                              |                     |            | NiNN-Et  | 92.61      |
|                                              |                     |            | TZDM-1   | 99.94      |
|                                              |                     |            | NN-F     | 97.27      |
|                                              |                     |            | NN-OTs   | 99.18      |
| acetonitrile: 10 mM aqueous ammonium acetate | 80/20               | 1.0 mL/min | NC-Me    | 99.73      |
|                                              |                     |            | NC-Et    | 98.41      |
|                                              |                     |            | NC-OH    | 96.36      |
|                                              |                     |            | NCC-Me   | 95.13      |

<sup>a</sup>HPLC data were obtained from Agilent 1260 system using ZORBAX SB-C18 column (5  $\mu\text{m}$ , 4.6  $\times$  250 mm). Signals of each compound were investigated by UV-detector under 254 nm.

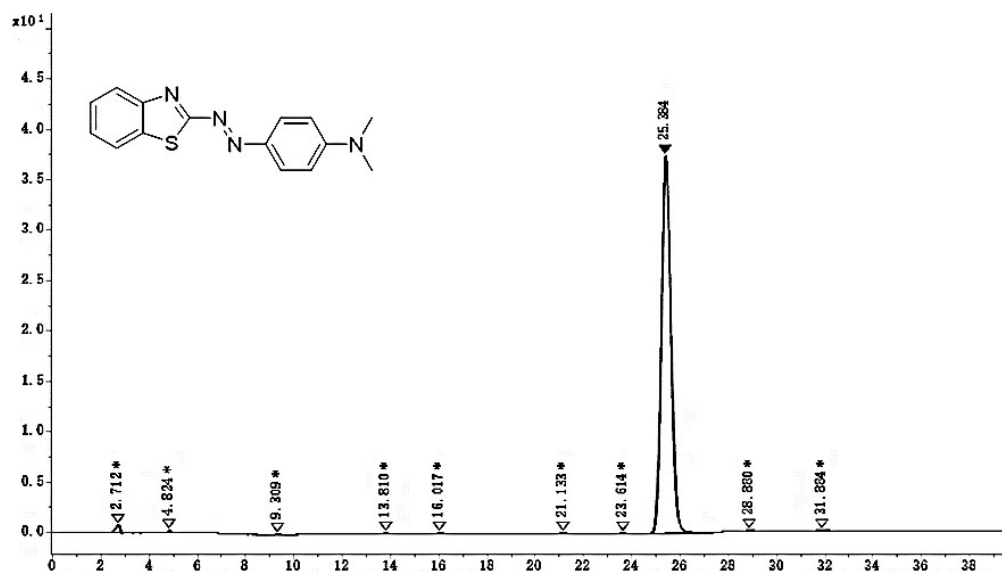

| Peak  | Compound     | Retention Time/min | AUC/mAU*s       | AUC%         |
|-------|--------------|--------------------|-----------------|--------------|
| 1     |              | 2.712              | 9.552           | 0.92         |
| 2     |              | 4.824              | 1.756           | 0.17         |
| 3     |              | 9.309              | 0.73            | 0.07         |
| 4     |              | 13.81              | 1.838           | 0.18         |
| 5     |              | 16.017             | 1.465           | 0.14         |
| 6     |              | 21.133             | 2.205           | 0.21         |
| 7     |              | 23.614             | 0.949           | 0.09         |
| 8     | <b>NN-Me</b> | <b>25.384</b>      | <b>1009.407</b> | <b>97.68</b> |
| 9     |              | 28.88              | 2.867           | 0.28         |
| 10    |              | 31.884             | 2.717           | 0.26         |
| Total |              |                    | 1033.486        | 100.00       |

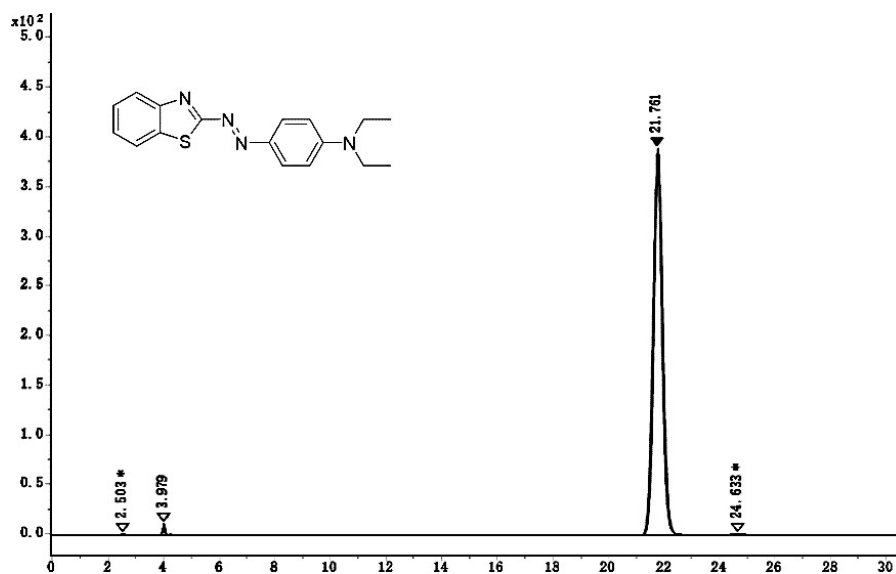

| Peak  | Compound     | Retention Time/min | AUC/mAU*s       | AUC%         |
|-------|--------------|--------------------|-----------------|--------------|
| 1     |              | 2.503              | 6.977           | 0.08         |
| 2     |              | 3.979              | 55.53           | 0.64         |
| 3     | <b>NN-Et</b> | <b>21.761</b>      | <b>8609.666</b> | <b>98.99</b> |
| 4     |              | 24.633             | 25.615          | 0.29         |
| Total |              |                    | 8697.788        | 100.00       |

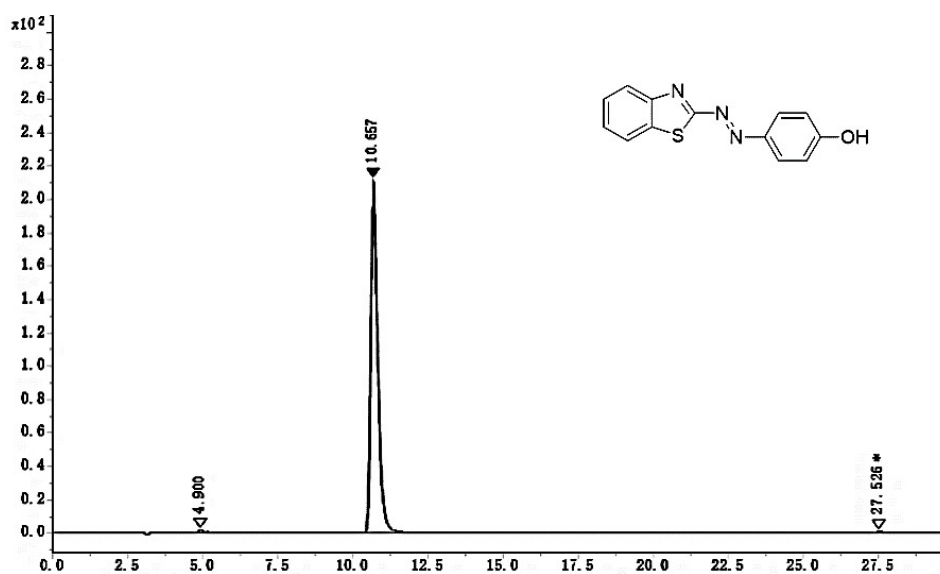

| Peak  | Compound     | Retention Time/min | AUC/mAU*s       | AUC%         |
|-------|--------------|--------------------|-----------------|--------------|
| 1     |              | 4.9                | 22.642          | 0.66         |
| 2     | <b>NN-OH</b> | <b>10.657</b>      | <b>3384.986</b> | <b>99.04</b> |
| 3     |              | 27.526             | 10.293          | 0.30         |
| Total |              |                    | 3417.921        | 100.00       |

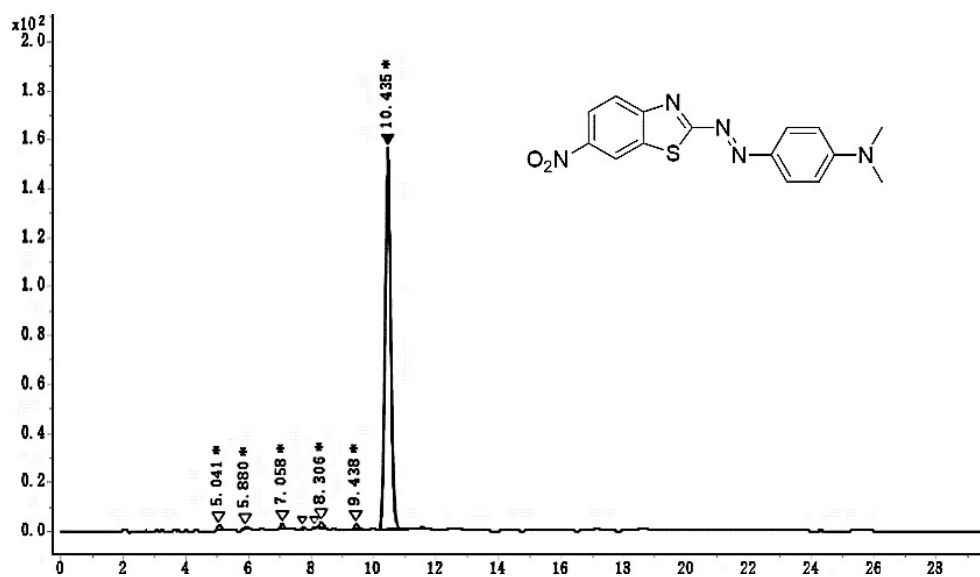

| Peak  | Compound       | Retention Time/min | AUC/mAU*s       | AUC%         |
|-------|----------------|--------------------|-----------------|--------------|
| 1     |                | 5.041              | 19.668          | 1.00         |
| 2     |                | 5.88               | 9.333           | 0.47         |
| 3     |                | 7.058              | 15.054          | 0.76         |
| 4     |                | 7.73               | 6.136           | 0.31         |
| 5     |                | 8.115              | 2.485           | 0.13         |
| 6     |                | 8.306              | 21.839          | 1.11         |
| 7     |                | 9.438              | 19.118          | 0.97         |
| 8     | <b>NiNN-Me</b> | <b>10.435</b>      | <b>1873.494</b> | <b>95.25</b> |
| Total |                |                    | 1967.127        | 100.00       |

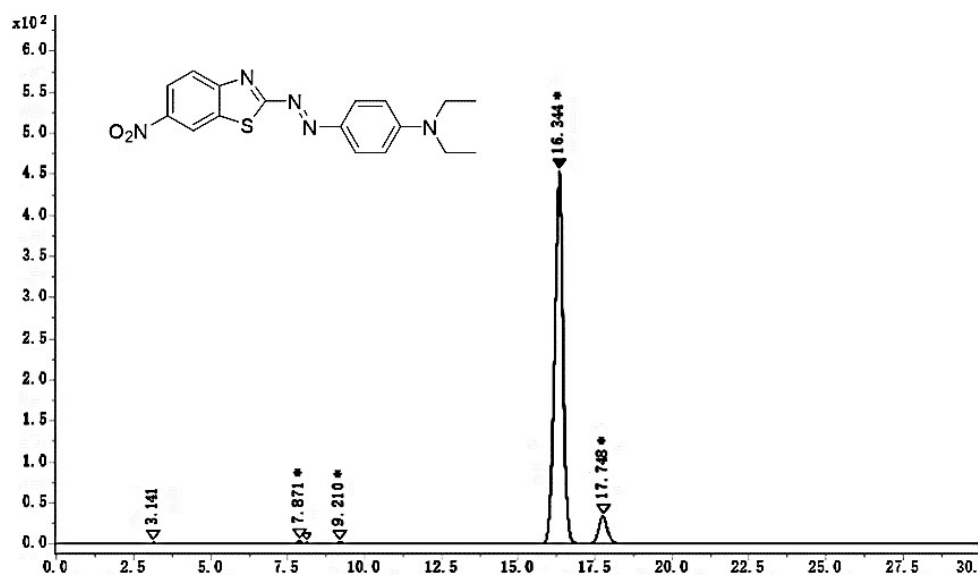

| Peak  | Compound       | Retention Time/min | AUC/mAU*s       | AUC%         |
|-------|----------------|--------------------|-----------------|--------------|
| 1     |                | 3.141              | 9.64            | 0.10         |
| 2     |                | 7.871              | 27.136          | 0.30         |
| 3     |                | 8.131              | 5.049           | 0.06         |
| 4     |                | 9.21               | 12.028          | 0.13         |
| 5     | <b>NiNN-Et</b> | <b>16.344</b>      | <b>8512.239</b> | <b>92.61</b> |
| 6     |                | 17.748             | 625.281         | 6.80         |
| Total |                |                    | 9191.373        | 100.00       |

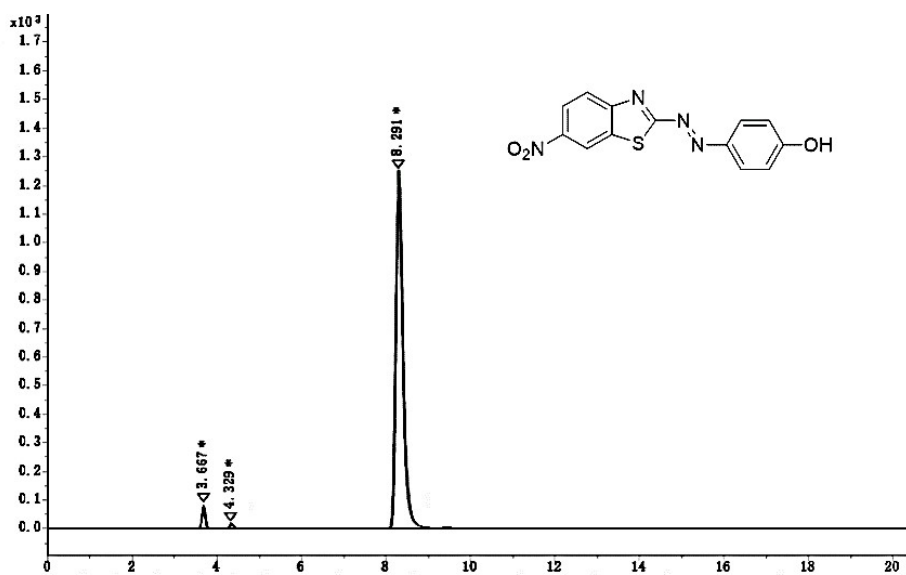

| Peak  | Compound       | Retention Time/min | AUC/mAU*s        | AUC%         |
|-------|----------------|--------------------|------------------|--------------|
| 1     |                | 3.667              | 412.907          | 2.77         |
| 2     |                | 4.329              | 100.380          | 0.67         |
| 3     | <b>NiNN-OH</b> | <b>8.291</b>       | <b>14417.818</b> | <b>96.56</b> |
| Total |                |                    | 14931.105        | 100.00       |

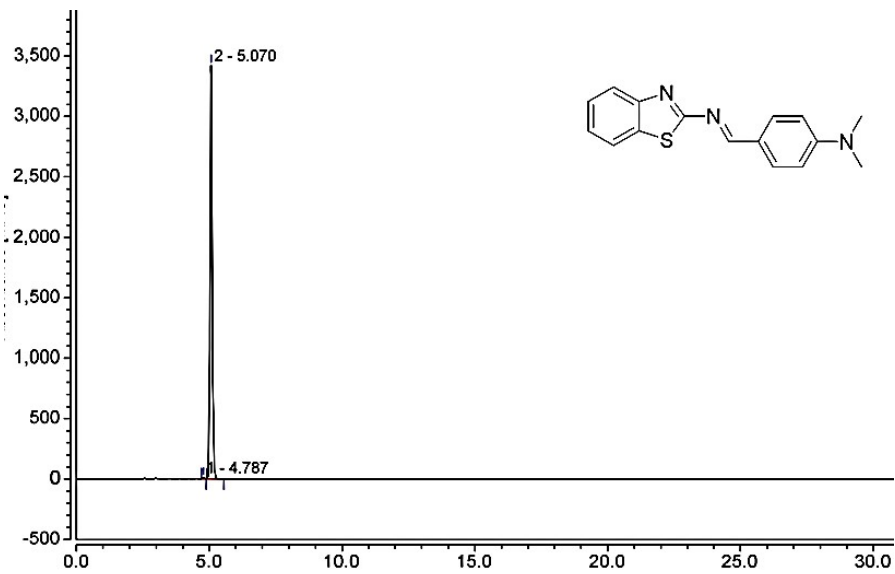

| Peak  | Compound     | Retention Time/min | AUC/mAU*min    | AUC%         |
|-------|--------------|--------------------|----------------|--------------|
| 1     |              | 4.787              | 0.869          | 0.27         |
| 2     | <b>NC-Me</b> | <b>5.070</b>       | <b>320.521</b> | <b>99.73</b> |
| Total |              |                    | 3429.990       | 100.00       |

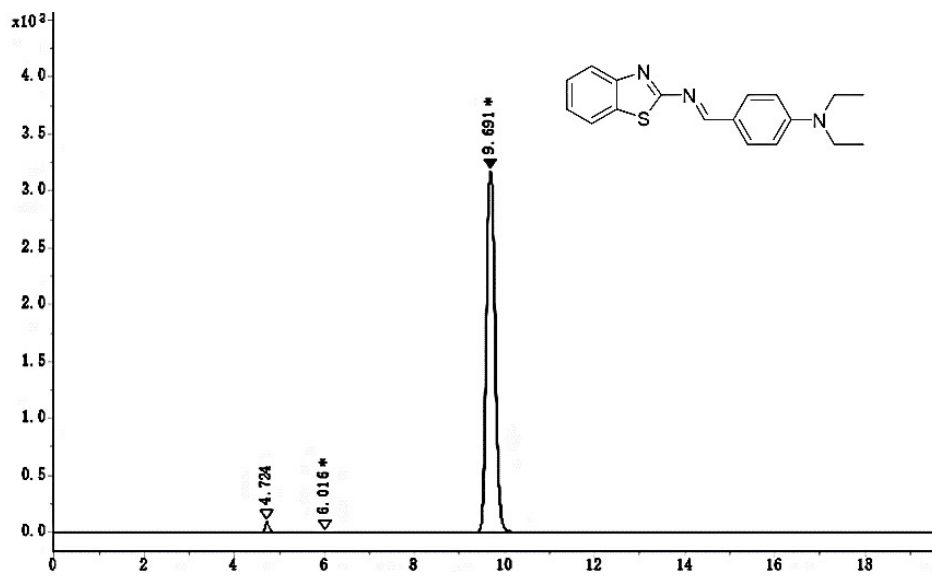

| Peak  | Compound     | Retention Time/min | AUC/mAU*s        | AUC%         |
|-------|--------------|--------------------|------------------|--------------|
| 1     |              | 4.723              | 661.218          | 1.53         |
| 2     |              | 6.017              | 24.534           | 0.06         |
| 3     | <b>NC-Et</b> | <b>9.687</b>       | <b>42410.239</b> | <b>98.41</b> |
| Total |              |                    | 43095.991        | 100.00       |

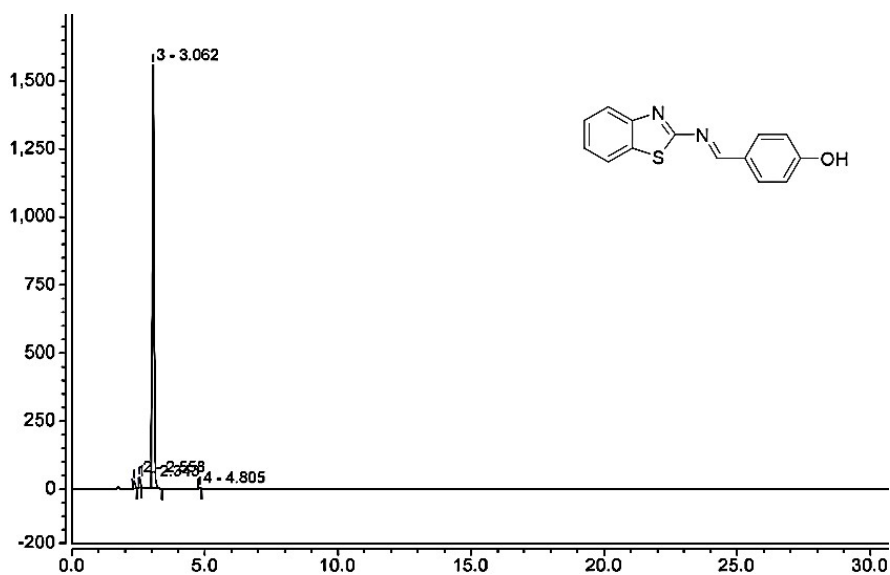

| Peak  | Compound     | Retention Time/min | AUC/mAU*min   | AUC%         |
|-------|--------------|--------------------|---------------|--------------|
| 1     |              | 2.343              | 1.531         | 1.56         |
| 2     |              | 2.558              | 1.666         | 1.69         |
| 3     | <b>NC-OH</b> | <b>3.062</b>       | <b>94.812</b> | <b>96.36</b> |
| 4     |              | 4.805              | 0.384         | 0.39         |
| Total |              |                    | 98.394        | 100.00       |

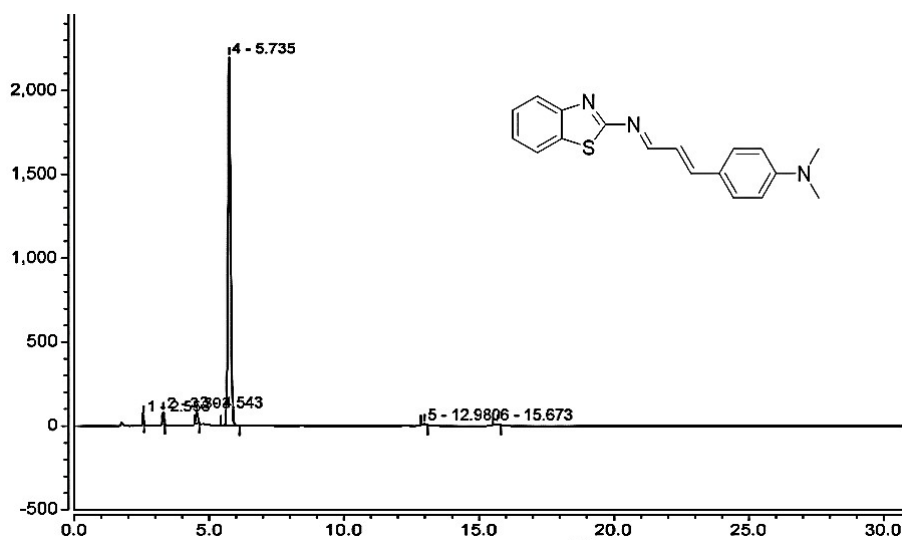

| Peak  | Compound      | Retention Time/min | AUC/mAU*min    | AUC%         |
|-------|---------------|--------------------|----------------|--------------|
| 1     |               | 2.558              | 1.379          | 0.56         |
| 2     |               | 3.303              | 3.553          | 1.43         |
| 3     |               | 4.543              | 5.336          | 2.15         |
| 4     | <b>NCC-Me</b> | <b>5.735</b>       | <b>235.690</b> | <b>95.13</b> |
| 5     |               | 12.980             | 0.766          | 0.31         |
| 6     |               | 15.673             | 1.027          | 0.41         |
| Total |               |                    | 247.751        | 100.00       |

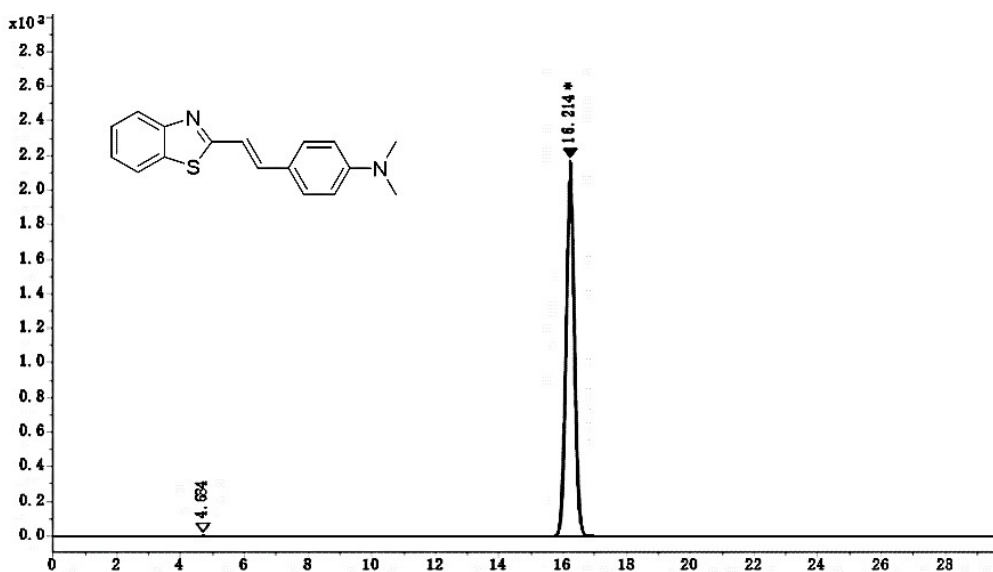

| Peak  | Compound      | Retention Time/min | AUC/mAU*s        | AUC%         |
|-------|---------------|--------------------|------------------|--------------|
| 1     |               | 4.684              | 21.173           | 0.06         |
| 2     | <b>TZDM-1</b> | <b>16.214</b>      | <b>37955.211</b> | <b>99.94</b> |
| Total |               |                    | 37976.384        | 100.00       |

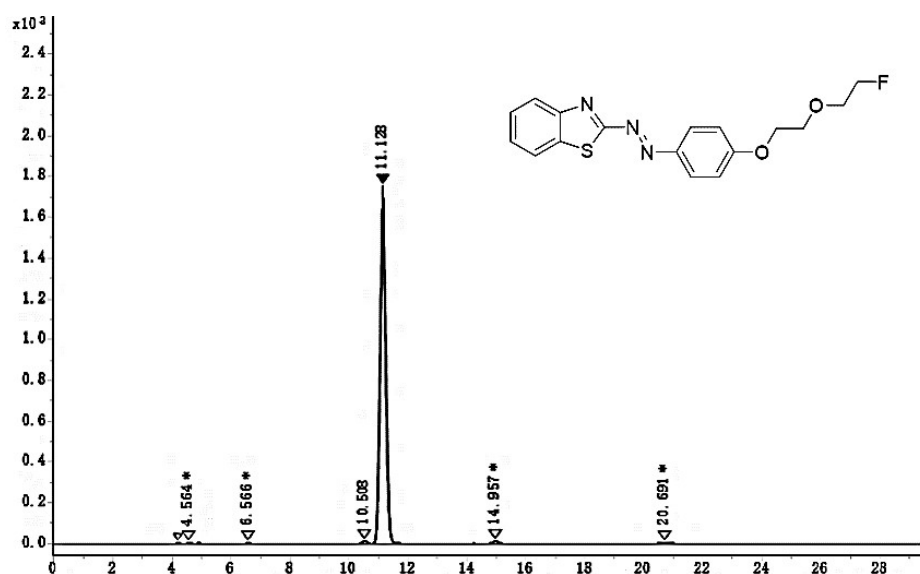

| Peak  | Compound    | Retention Time/min | AUC/mAU*s        | AUC%         |
|-------|-------------|--------------------|------------------|--------------|
| 1     |             | 4.195              | 38.84            | 0.17         |
| 2     |             | 4.564              | 74.734           | 0.33         |
| 3     |             | 6.566              | 16.365           | 0.07         |
| 4     |             | 10.508             | 172.511          | 0.76         |
| 5     | <b>NN-F</b> | <b>11.128</b>      | <b>22082.733</b> | <b>97.27</b> |
| 6     |             | 14.957             | 152.61           | 0.67         |
| 7     |             | 20.691             | 165.182          | 0.73         |
| Total |             |                    | 22702.975        | 100.00       |



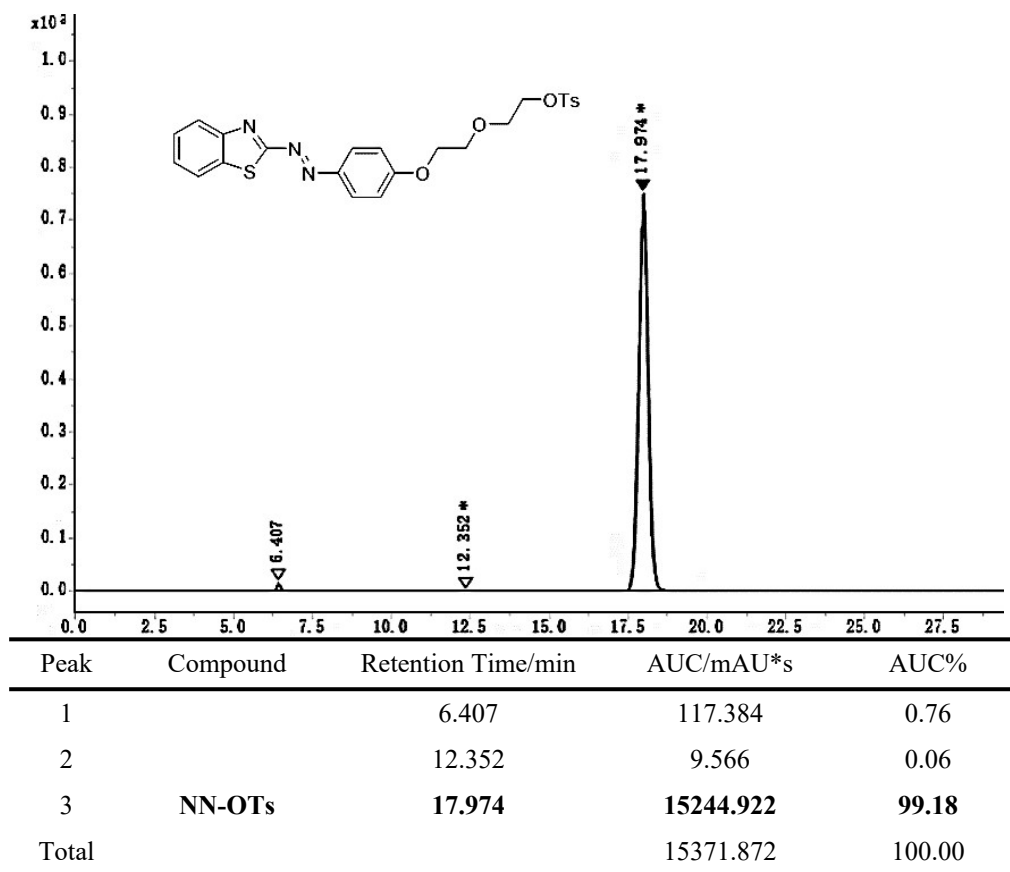

Fig. S15 HPLC data of compounds.

### 3. Optical Measurements.

Table S2 Basic properties of compounds.

| compound       | Solvent <sup>a</sup>            | $\lambda_{\text{abs}}^b$<br>(nm) | $\lambda_{\text{ex}}^b$<br>(nm) | $\lambda_{\text{em}}^b$<br>(nm) | Stokes<br>shift | $\epsilon^b$<br>(L·M <sup>-1</sup> ·cm <sup>-1</sup> ) | $\Phi^c$<br>(%) |
|----------------|---------------------------------|----------------------------------|---------------------------------|---------------------------------|-----------------|--------------------------------------------------------|-----------------|
| <b>NN-Me</b>   | CH <sub>2</sub> Cl <sub>2</sub> | 502                              | 503                             | 577                             | 74              | 54 420                                                 | 0.05            |
|                | MeOH                            | 509                              | 510                             | 596                             | 86              | 40 630                                                 |                 |
|                | DMSO                            | 520                              | 525                             | 618                             | 93              | 25 690                                                 |                 |
|                | PBS                             | 548                              | 554                             | 672                             | 118             | 14 080                                                 |                 |
| <b>NN-Et</b>   | CH <sub>2</sub> Cl <sub>2</sub> | 510                              | 511                             | 576                             | 65              | 55 540                                                 | 0.05            |
|                | MeOH                            | 517                              | 517                             | 606                             | 89              | 49 910                                                 |                 |
|                | DMSO                            | 527                              | 528                             | 622                             | 94              | 47 710                                                 |                 |
|                | PBS                             | 545                              | 547                             | 667                             | 120             | 11 880                                                 |                 |
| <b>NN-OH</b>   | CH <sub>2</sub> Cl <sub>2</sub> | 389                              | 390                             | 433                             | 43              | 20 390                                                 | 0.57            |
|                | MeOH                            | 406                              | 407                             | 458                             | 51              | 21 620                                                 |                 |
|                | DMSO                            | 413                              | 416                             | 470                             | 54              | 20 980                                                 |                 |
|                | PBS                             | 512                              | 515                             | 620                             | 105             | 32 560                                                 |                 |
| <b>NiNN-Me</b> | CH <sub>2</sub> Cl <sub>2</sub> | 539                              | 540                             | 584                             | 44              | 44 490                                                 | 0.06            |
|                | MeOH                            | 545                              | 545                             | 625                             | 80              | 14 760                                                 |                 |
|                | DMSO                            | 561                              | 562                             | 645                             | 83              | 25 810                                                 |                 |
|                | PBS                             | 451                              | 455                             | 536                             | 81              | 17 270                                                 |                 |
| <b>NiNN-Et</b> | CH <sub>2</sub> Cl <sub>2</sub> | 546                              | 547                             | 580                             | 33              | 44 970                                                 | 0.05            |
|                | MeOH                            | 548                              | 585                             | 628                             | 43              | 42 000                                                 |                 |
|                | DMSO                            | 563                              | 605                             | 646                             | 41              | 39 650                                                 |                 |
|                | PBS                             | 515                              | 583                             | 625                             | 42              | 20 540                                                 |                 |
| <b>NiNN-OH</b> | CH <sub>2</sub> Cl <sub>2</sub> | 401                              | 402                             | 455                             | 53              | 23 350                                                 | 0.04            |
|                | MeOH                            | 554                              | 556                             | 599                             | 43              | 29 080                                                 |                 |
|                | DMSO                            | 586                              | 587                             | 630                             | 43              | 30 560                                                 |                 |
|                | PBS                             | 548                              | 548                             | 590                             | 42              | 46 170                                                 |                 |
| <b>NC-Me</b>   | CH <sub>2</sub> Cl <sub>2</sub> | 415                              | 421                             | 500                             | 79              | 50 890                                                 | 0.14            |

|               |                                 |     |     |     |     |        |      |
|---------------|---------------------------------|-----|-----|-----|-----|--------|------|
|               | MeOH                            | 420 | 428 | 505 | 77  | 38 090 |      |
|               | DMSO                            | 424 | 424 | 509 | 85  | 413 00 |      |
|               | PBS                             | 430 | 432 | 505 | 73  | 29 090 |      |
| <b>NC-Et</b>  | CH <sub>2</sub> Cl <sub>2</sub> | 422 | 426 | 498 | 72  | 63 730 | 0.13 |
|               | MeOH                            | 428 | 447 | 509 | 62  | 53 640 |      |
|               | DMSO                            | 430 | 432 | 510 | 78  | 37 220 |      |
|               | PBS                             | 438 | 438 | 512 | 74  | 15 200 |      |
| <b>NC-OH</b>  | CH <sub>2</sub> Cl <sub>2</sub> | 351 | 353 | 393 | 40  | 22 130 | 0.83 |
|               | MeOH                            | 360 | 360 | 401 | 41  | 18 700 |      |
|               | DMSO                            | 364 | 364 | 405 | 41  | 33 800 |      |
|               | PBS                             | 384 | 388 | 443 | 55  | 19 210 |      |
| <b>NCC-Me</b> | CH <sub>2</sub> Cl <sub>2</sub> | 449 | 473 | 580 | 107 | 44 670 | 0.11 |
|               | MeOH                            | 461 | 483 | 596 | 113 | 45 650 |      |
|               | DMSO                            | 462 | 462 | 600 | 138 | 43 270 |      |
|               | PBS                             | 405 | 471 | 606 | 135 | 21 770 |      |
| <b>TZDM-1</b> | CH <sub>2</sub> Cl <sub>2</sub> | 397 | 397 | 489 | 92  | 23 270 | 0.68 |
|               | MeOH                            | 401 | 401 | 514 | 113 | 26 700 |      |
|               | DMSO                            | 406 | 409 | 521 | 112 | 23 760 |      |
|               | PBS                             | 351 | 392 | 538 | 146 | 18 430 |      |

<sup>a</sup>PBS represents spectra of each compound (1  $\mu$ M) detected in PBS solutions (pH 7.4, containing 5% DMSO), while CH<sub>2</sub>CH<sub>2</sub>, MeOH, DMSO represent spectra of each compound (10  $\mu$ M) detected in respective organic solvents. <sup>b</sup> $\lambda_{\text{abs}}$ ,  $\lambda_{\text{ex}}$ ,  $\lambda_{\text{em}}$ , and  $\epsilon$  represent maximum absorption wavelength, maximum excitation wavelength, maximum emission wavelength, and molar absorption coefficient, respectively. <sup>c</sup> $\Phi$  represents fluorescence quantum yield (%) of respective compounds (1  $\mu$ M) in CH<sub>2</sub>Cl<sub>2</sub>.

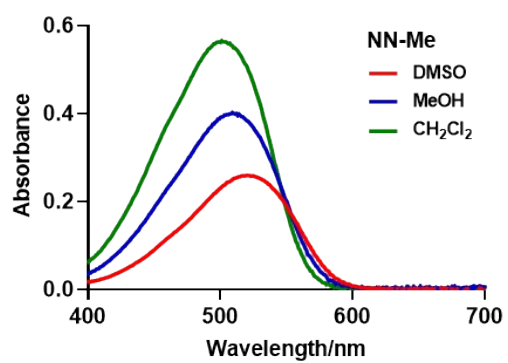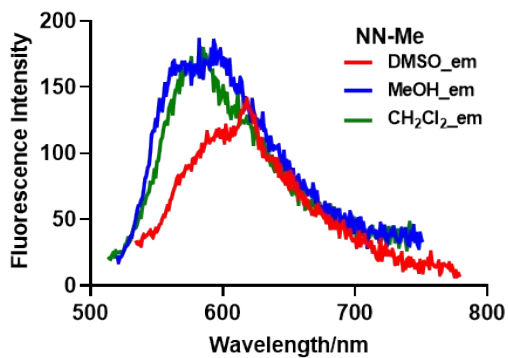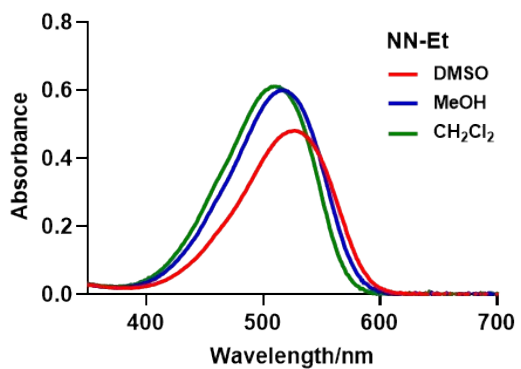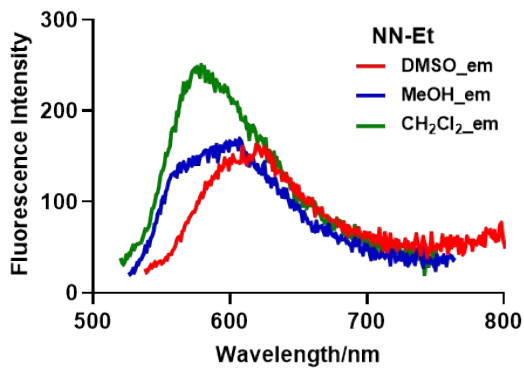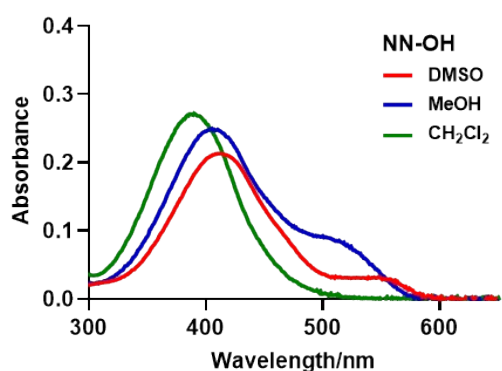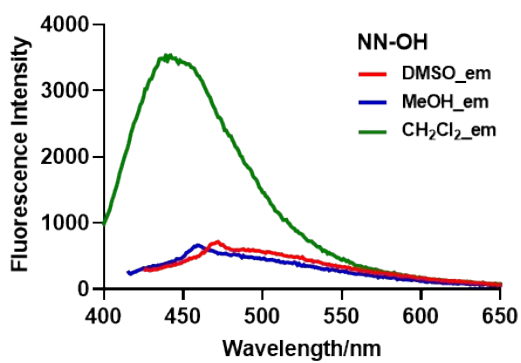

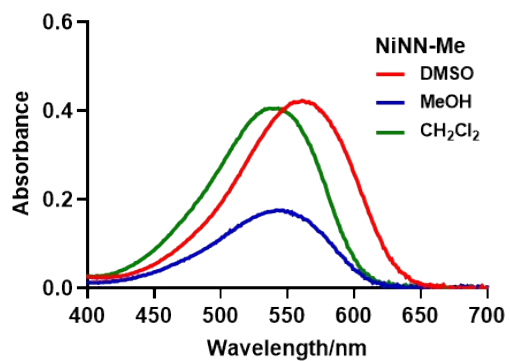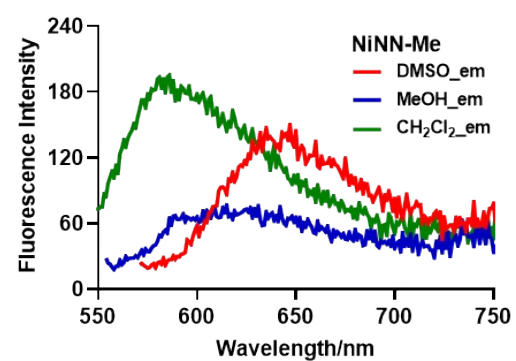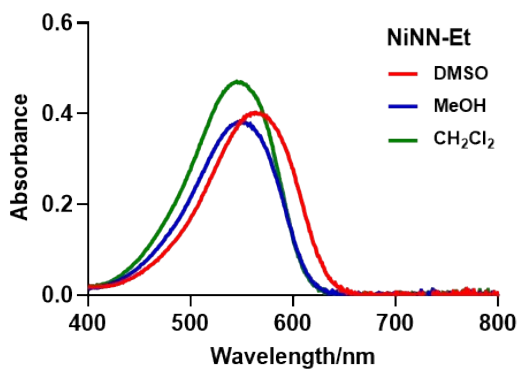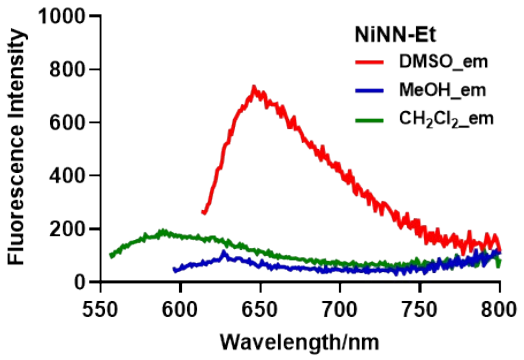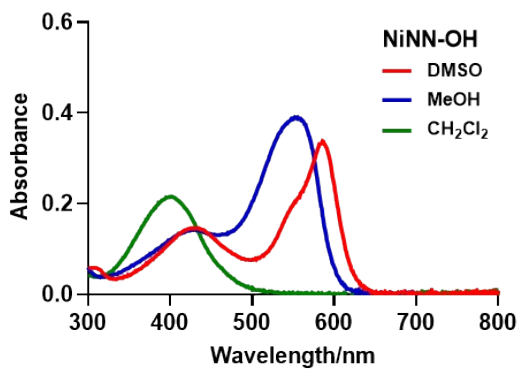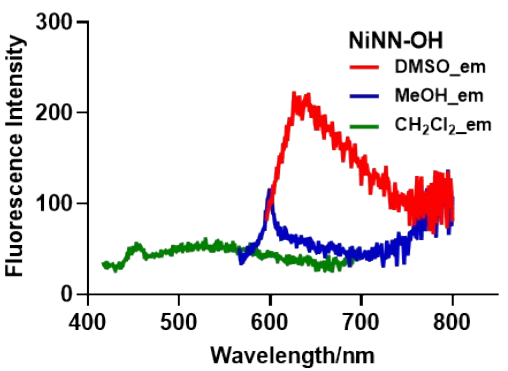

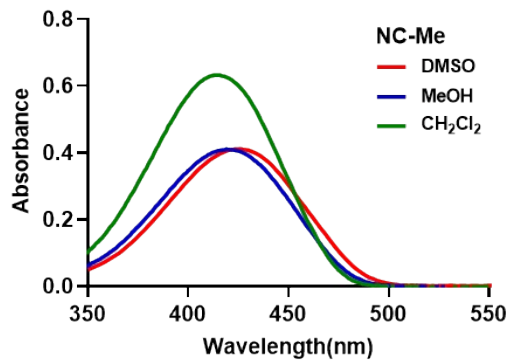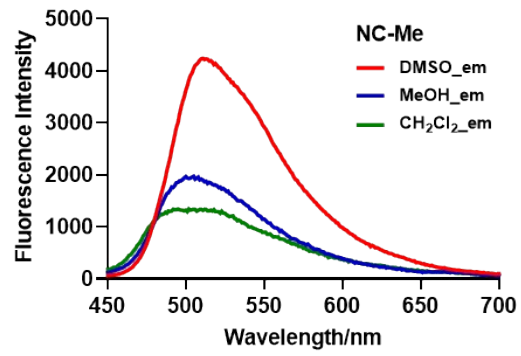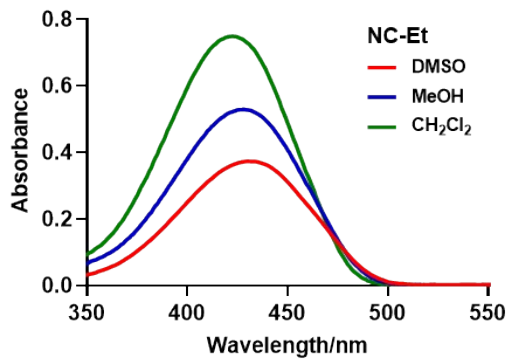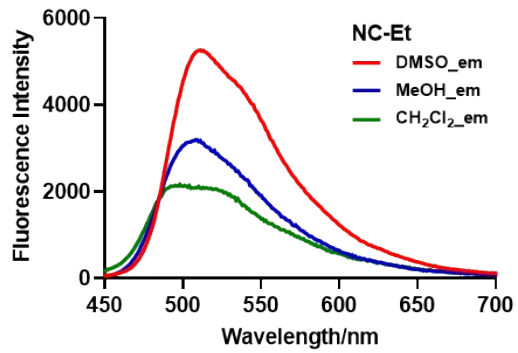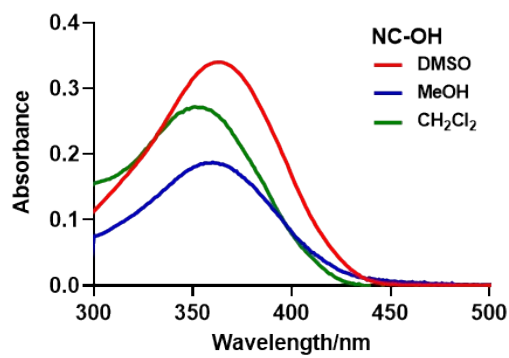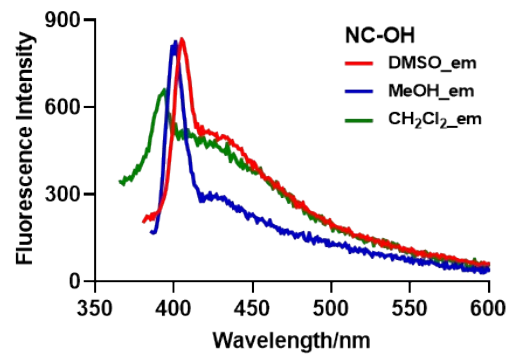

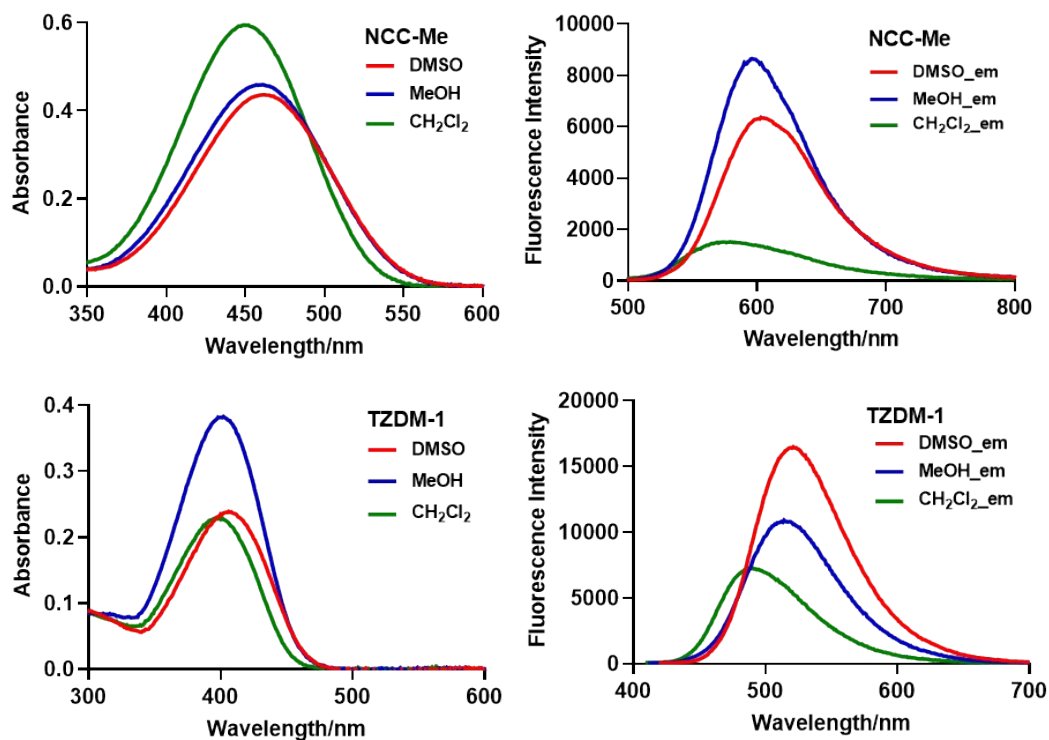

**Fig. S16** Absorption spectra (left) and fluorescence emission spectra (right) of compounds (10  $\mu$ M) in different solvents.

#### 4. Preparation of Protein Aggregates.

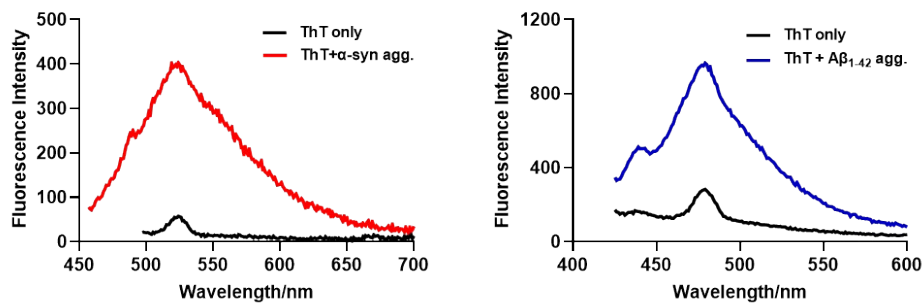

**Fig. S17** Confirmation of protein aggregation by thioflavin T (ThT) in PBS solutions (pH = 7.4, containing 4% ethanol).

## 5. Spectral Measurements with Protein Aggregates in Solutions.

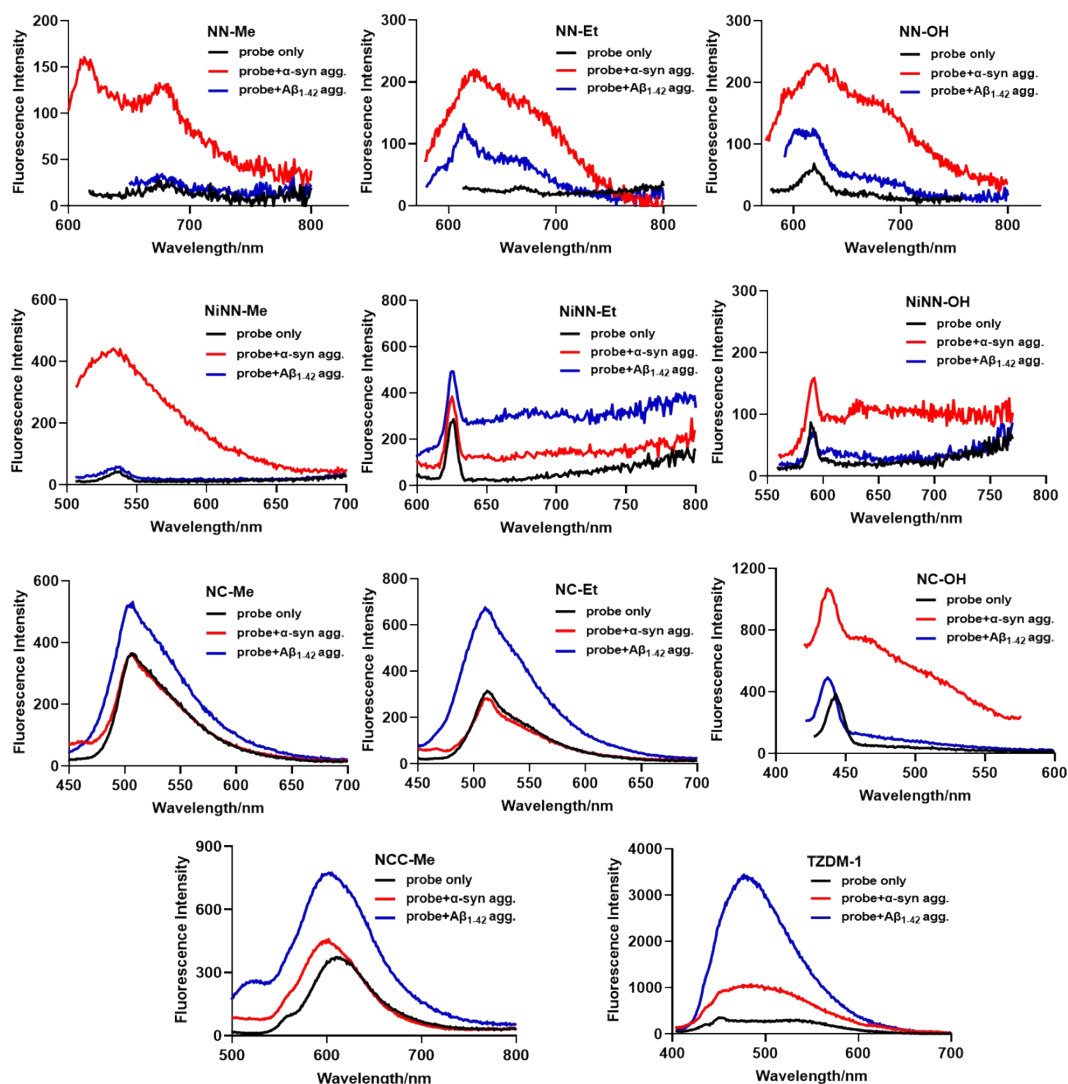

**Fig. S18** Fluorescence spectra of each compound (1  $\mu\text{M}$ ) upon mixing with protein aggregates (2.75  $\mu\text{M}$ ) in PBS solutions (pH = 7.4, containing 5% DMSO).

## 6. Fluorescence staining.

Compounds with N=N linkage were evaluated towards pathological  $\alpha$ -syn aggregates using 16- $\mu\text{m}$ -thick frozen brain slices from an aged A53T-Tg mouse (24-month-old, male). Fluorescent images were observed after the addition of each compound to respective brain slices, and aggregated  $\alpha$ -syn pathology was confirmed by immunostaining with Syn 505 antibody.<sup>1, 2</sup> To be more specific, brain slices were incubated with each compound (50  $\mu\text{M}$ , 50% ethanol) for 20 min, dried at room temperature after  $2 \times 1$  min washes in 50% ethanol.<sup>3</sup> To confirm the presence of aggregated  $\alpha$ -syn pathology, the same slices were first treated with 0.1% Triton X-

100 in PBS solutions (0.01 M, pH = 7.4) for permeabilization for 5 min and washed with PBS solutions. After drying, the slices were incubated with normal goat serum for blocking at room temperature for 1.5 h, then washed with PBS solutions. The slices were next incubated with an anti- $\alpha$ -syn monoclonal antibody (1:1000, Syn 505, Invitrogen, USA) at 4°C for 20 h. After that, the slices were incubated with Alexa Fluor 488-conjugated secondary antibody (1:500, Beyotime, China) at 37°C for 1.5 h after 3  $\times$  5 min washes in PBS-Tween 20 solutions (0.3% Tween 20), followed by another three washes, and were finally observed on the EVOS FL imaging system (Life, USA) equipped with standard filter sets of GFP and RFP. For fluorescence staining of **NN-F**, 16- $\mu$ M-thick frozen brain slices from the aged A53T-Tg mouse (24-month-old, male) and 8- $\mu$ M-thick deparaffinized slices from a PD patient (80-year-old, female) were used. Of note, paraffin-embedded brain slices were first deparaffinized with 2  $\times$  10 min washes in xylene, 2  $\times$  2 min washes in 100% ethanol, 2 min wash in 90% ethanol/water, 2 min wash in 80% ethanol/water, 2 min wash in 70% ethanol/water, 2  $\times$  2 min washes in water, and then were allowed to dry at room temperature. Brain slices were incubated with **NN-F** (50  $\mu$ M, 50% ethanol) for 20 min, then dried at room temperature after 2  $\times$  1 min washes in 50% ethanol. The same slices were also conducted to immunostaining using Syn 505 antibody. Differently, an Alexa Fluor 647-conjugated secondary antibody (1:500, Beyotime, China) was used and images were obtained from SLIDEVIEW VS200 scanning system (Olympus, Japan) equipped with DAPI, FITC, and CY5 filters.

As shown in Figure S19, fluorescent labeling of **NN-OH** colocalized well with Syn505 immunofluorescence, while **NN-Me** and **NN-Et** showed obvious nonspecific staining on the brain tissue. Notably, **NiNN-Me** and **NiNN-Et** with nitro group displayed improved colocalization with Syn505 antibody compared to **NN-Me** and **NN-Et**, indicative of the effectiveness of nitro group for  $\alpha$ -syn binding. The neuropathological staining results were consistent with the results for  $\alpha$ -syn aggregates in solution in vitro, suggesting that benzothiazole derivative with N=N linkage could bind to pathological  $\alpha$ -syn aggregates as well as  $\alpha$ -syn aggregates in solution.



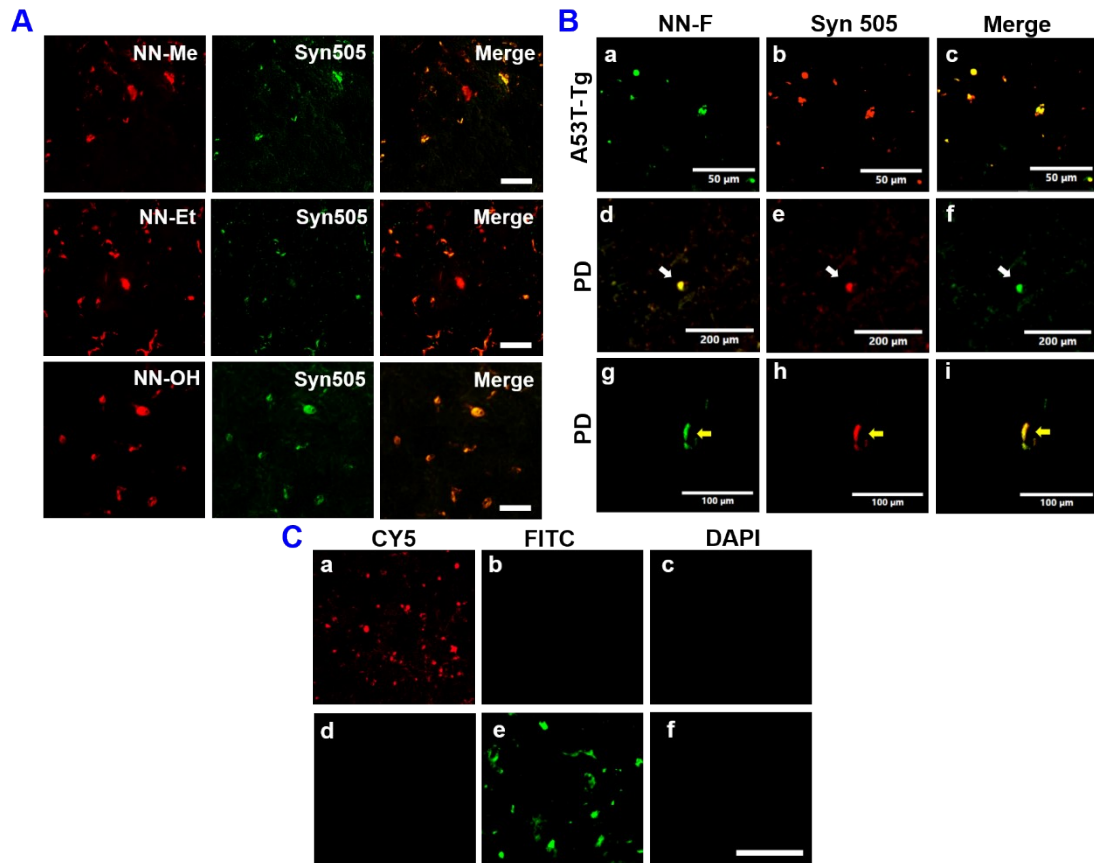

**Fig. S19** (A) Double staining of  $\alpha$ -syn pathology in an A53T-Tg mouse (24-month-old, male) with NN series (50  $\mu$ M, 50% ethanol) and Syn 505 monoclonal antibody. Scale bar = 20  $\mu$ M. (B) Double staining of  $\alpha$ -syn pathology in the A53T-Tg mouse (24-month-old, male) and a PD patient (80-year-old, female) with NN-F (50  $\mu$ M, 50% ethanol) and Syn 505 monoclonal antibody. LBs: white arrow head; LNs: yellow arrow head. Scale bar = 50  $\mu$ M. (a-c), 200  $\mu$ M (d-f), 100  $\mu$ M (g-i). NN-F efficiently labeled pathological  $\alpha$ -syn aggregates in brain tissue from aged A53T-Tg mouse and in PD brain tissue. (C) Immunostaining of  $\alpha$ -syn pathology in the A53T-Tg mouse brain (24-month-old, male) with Syn 505 monoclonal antibody. (a-c) Syn 505 + Alexa Fluor 647-conjugated secondary antibody; (d-f) Syn 505 + Alexa Fluor 488-conjugated secondary antibody. Scale bar = 200  $\mu$ M.

## 7. Saturation Binding Assays of NN-F.

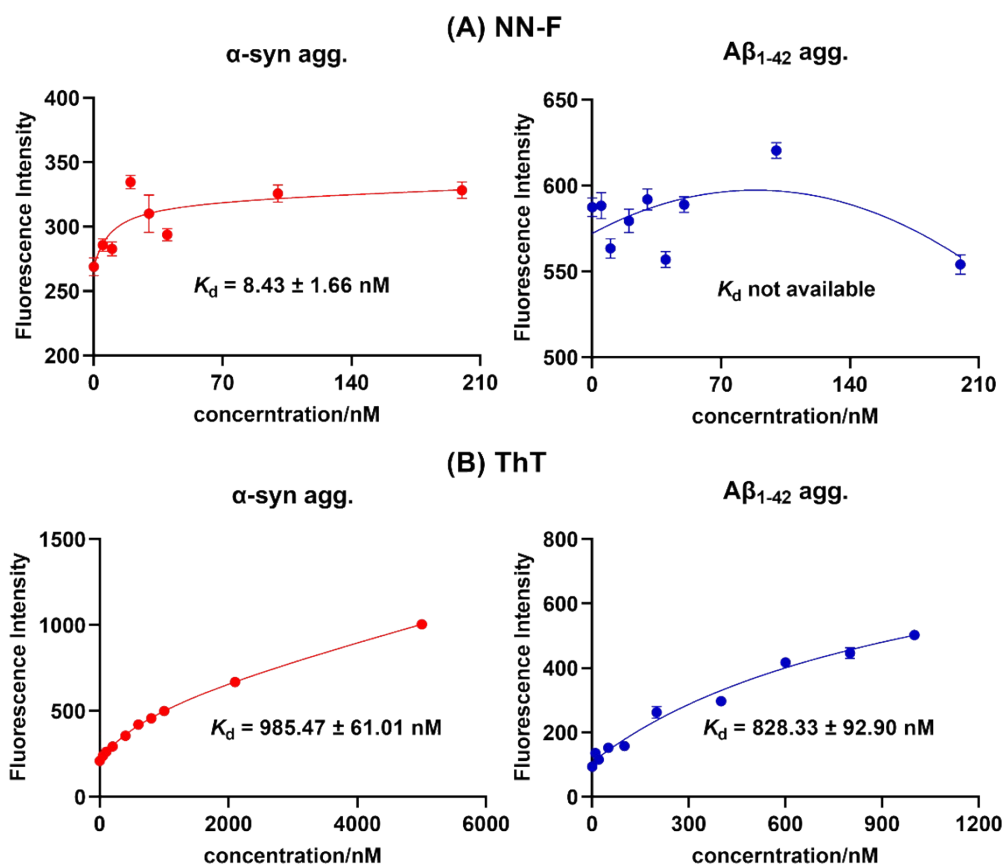

**Fig. S20** Saturation curves of NN-F and ThT with protein aggregates in PBS solutions (pH = 7.4, containing 5% DMSO).

## 8. Stability Studies.

**Table S3** Stability of [ $^{18}\text{F}$ ]NN-F in the mouse plasma.

|        | NO. | Retention time (min) <sup>a</sup> | Concentration (%) |
|--------|-----|-----------------------------------|-------------------|
| 30 min | 1   | 4.612                             | 6.94              |
|        | 2   | 7.353                             | 93.06             |
| 60 min | 1   | 4.888                             | 5.21              |
|        | 2   | 7.505                             | 91.19             |
|        | 3   | 3.704                             | 3.60              |

<sup>a</sup>HPLC profiles were obtained from Agilent 1100 system equipped with UV-vis and  $\gamma$ -detector, using ZORBAX SB-C18 column (5  $\mu\text{m}$ , 4.6  $\times$  250 mm) with mobile phase at a flow rate of 1.0 mL/min.

**Table S4** Stability of NN-F in acetonitrile.

|                       | NO. | Retention time (min) <sup>a</sup> | Concentration (%) |
|-----------------------|-----|-----------------------------------|-------------------|
| 0 min                 | 1   | 4.318                             | 0.44              |
|                       | 2   | 8.136                             | 99.56             |
| Daylight-2 h          | 1   | 5.087                             | 7.86              |
|                       | 2   | 8.498                             | 92.14             |
| UV <sub>254</sub> -1h | 1   | 5.210                             | 7.75              |
|                       | 2   | 8.611                             | 92.25             |
| UV <sub>254</sub> -2h | 1   | 5.054                             | 7.36              |
|                       | 2   | 8.451                             | 92.64             |
| Heat                  | 1   | 5.250                             | 61.25             |
|                       | 2   | 8.634                             | 38.75             |
| Removal of heat       | 1   | 5.047                             | 36.38             |
|                       | 2   | 8.357                             | 63.62             |

<sup>a</sup>HPLC profiles were obtained from Agilent 1100 system using ZORBAX SB-C18 column (5  $\mu$ m, 4.6  $\times$  250 mm) with mobile phase at a flow rate of 1.0 mL/min. Signals of NN-F were investigated by UV-detector under 254 nm.

## References

1. E. A. Waxman, J. E. Duda and B. I. Giasson, *Acta Neuropathologica*, 2008, **116**, 37-46.
2. J. E. Duda, B. I. Giasson, M. E. Mabon, V. M. Y. Lee and J. Q. Trojanowski, *Annals of Neurology*, 2002, **52**, 205-210.
3. H. Watanabe, M. Ono, T. Ariyoshi, R. Katayanagi and H. Saji, *ACS Chemical Neuroscience*, 2017, **8**, 1656-1662.
